# Supplementary material for: Effect of Financial Bonus Size, Loss Aversion, and Increased Social Pressure on Physician Pay-for-Performance: A Randomized Clinical Trial and Cohort Study
Source: PubMed Central journal article supplement (PMC6484616; doi:10.1001/jamanetworkopen.2018.7950), 2019-02-08
Supplement: jamanetwopen-2-e187950-s001.pdf [file jamanetwopen-2-e187950-s001.pdf]

1                   **Supplemental 1. Study Protocol and Changes to Analysis Plan**

2   Effect of Financial Bonus Sizes, Loss Aversion, and Increased Social Pressure on Physician Pay-  
3                   for-Performance: A Randomized Trial and Cohort Study

4                   **Principal Investigators:**

5                   Amol S. Navathe, MD, PhD  
6                   Assistant Professor of Medicine and Health Policy, Perelman School of Medicine  
7                   Staff Physician, CHERP, Philadelphia VA Medical Center  
8                   Associate Director, Center for Health Incentives and Behavioral Economics  
9                   Senior Fellow, Leonard Davis Institute of Health Economics, The Wharton School  
10                  University of Pennsylvania

11                 Ezekiel J. Emanuel, MD, PhD  
12                 Provost for Global Initiatives  
13                 Diane v S. Levy and Robert M. Levy University Professor  
14                 Chair of the Department of Medical Ethics and Health Policy  
15                 University of Pennsylvania

16                 Kevin G. Volpp, MD, PhD  
17                 Founders President’s Distinguished Professor  
18                 Director, Center for Health Incentives and Behavioral Economics  
19                 Division Chief, Health Policy, Department of Medical Ethics and Health Policy  
20                 Perelman School of Medicine  
21                 University of Pennsylvania

22                   **Supported by:**

23                   **The Commonwealth Fund**  
24                   Grant No. 20150753

25                   And

26                   **The Robert Wood Johnson Foundation**  
27                   Grant No. 73111

28

29 **Table of Contents**

30 STUDY TEAM ROSTER..... 4

31 PARTICIPATING STUDY SITES ..... 6

32 PRÉCIS ..... 7

33 STUDY PROTOCOL ..... 9

34 **1. Study Objectives**..... 9

35 **1.1 Primary Objective**..... 9

36 **1.2 Secondary Objectives**..... 9

37 **2. Background on Behavioral Economics, Physician Incentives, and Primary Study Focus** ..... 9

38 **2.1 Background** ..... 9

39 **2.2 Study Rationale** ..... 10

40 **3. Study Design** ..... 11

41 **4. Selection and Enrollment of Participants** ..... 13

42 **4.1 Inclusion Criteria** ..... 13

43 **4.2 Exclusion Criteria** ..... 13

44 **4.3 Study Enrollment Procedures** ..... 13

45 **5. Study Interventions**..... 13

46 **5.2 Handling of Study Intervention** ..... 14

47 **6. Study Procedures** ..... 14

48 **6.1 Study Timeline** ..... 15

49 **6.3 Description of Evaluation**..... 15

50 **7. Safety Assessments** ..... 15

51 **7.1 Safety Monitoring** ..... 15

52 **8. Statistical Considerations** ..... 15

53 **8.1 General Design and Sample Size** ..... 16

54 **8.2 Sample Size and Randomization** ..... 16

55 **8.3 Outcomes** ..... 16

56 **8.4 Data Analyses** ..... 17

57 **9. Data Storage, Privacy, and Disclosure** ..... 17

58 **9.1 Data Storage** ..... 17

59 **9.2 Privacy** ..... 18

60 **9.3 Data Disclosure**..... 18

61 **10. Participant Rights and Confidentiality** ..... 18

62 **10.1 Institutional Review Board (IRB) Review** ..... 18

63 **10.2 Informed Consent Forms** ..... 18

64 **10.3 Study Discontinuation**..... 18

65 **11. Publication of Research Findings** ..... 19

66 SUMMARY OF CHANGES TO ORIGINAL PROTOCOL ..... 20

67 **Changes before the start of the intervention period:** ..... 20

68 **Changes after the start of the intervention period:**..... 21

69 PHYSICIAN SURVEY - PRE..... 22

70 PHYSICIAN SURVEY - POST ..... 24

71 ADDITIONAL METHODS FROM PAPER..... 26

72 **Pre-Trial Exclusions** ..... 26

73 **Data Abstraction** ..... 26

74 **Bootstrapping for Risk-Standardized Primary Outcome Measures** ..... 26

75 DEFINITION OF CLINICAL INTEGRATION SCORE ..... 27

76 REFERENCES ..... 28

77

78

79

80 **STUDY TEAM ROSTER**

81

82 **University of Pennsylvania**

83 Amol S. Navathe, MD, PhD. (Co-Principal Investigator), Department of Medical Ethics and  
84 Health Policy, University of Pennsylvania, 423 Guardian Drive, 1108 Blockley Hall,  
85 Philadelphia, PA 19104, Office: 215-573-4947, [amol@wharton.upenn.edu](mailto:amol@wharton.upenn.edu)

86 Ezekiel J. Emanuel, MD, PhD (Co-Principal Investigator), Department of Medical Ethics and  
87 Health Policy, University of Pennsylvania, 423 Guardian Drive, 14 Blockley Hall, Philadelphia,  
88 PA 19104, Office: 215-898-7226, [zemanuel@upenn.edu](mailto:zemanuel@upenn.edu)

89 Kevin Volpp, MD, PhD (Co-Principal Investigator), Department of Medical Ethics and Health  
90 Policy, University of Pennsylvania, 423 Guardian Drive, 1120 Blockley Hall, Philadelphia, PA  
91 19104, Office: 215-573-0270, [volpp70@wharton.upenn.edu](mailto:volpp70@wharton.upenn.edu)

92 Judy Shea, PhD (Co-investigator), Department of Medicine, University of Pennsylvania, 423  
93 Guardian Hall, 1229 Blockley Hall, Philadelphia, PA 19104, Office: 215-573-5111,  
94 [sheaja@penmedicine.upenn.edu](mailto:sheaja@penmedicine.upenn.edu)

95 Dylan Small, PhD Department of Statistics, University of Pennsylvania, 464 Jon M. Huntsman  
96 Hall, 3730 Walnut Street, Philadelphia, PA 19104, Office: 215-573-5241,  
97 [dsmall@wharton.upenn.edu](mailto:dsmall@wharton.upenn.edu)

98 Amelia Bond, PhD, Department of Health Care Management, The Wharton School, University  
99 of Pennsylvania, 3641 Locust Walk, Philadelphia, PA 19104, [ambond@wharton.upenn.edu](mailto:ambond@wharton.upenn.edu)

100 Kristen Caldarella, MHA, Department of Medical Ethics and Health Policy, University of  
101 Pennsylvania, 423 Guardian Drive, 1138 Blockley Hall, Philadelphia, PA 19104, Office: 215-  
102 573-4934, [kcald@penmedicine.upenn.edu](mailto:kcald@penmedicine.upenn.edu)

103 Shireen Matloubieh, MPH, Department of Medical Ethics and Health Policy, University of  
104 Pennsylvania, 423 Guardian Drive, 1136 Blockley Hall, Philadelphia, PA 19104, Office: 215-  
105 573-6742, [smatlo@penmedicine.upenn.edu](mailto:smatlo@penmedicine.upenn.edu)

106 Zoe Lyon, BA, Department of Medical Ethics and Health Policy, University of Pennsylvania,  
107 423 Guardian Drive, 1136 Blockley Hall, Philadelphia, PA 19104, Office: 215-573-2688,  
108 [zlyon@penmedicine.upenn.edu](mailto:zlyon@penmedicine.upenn.edu)

109 Jingsan Zhu, MBA, MS, Department of Medical Ethics and Health Policy, University of  
110 Pennsylvania, 423 Guardian Drive, 1113 Blockley Hall, Philadelphia, PA 19104, Office: 215-  
111 573-9731, [jingsan@penmedicine.upenn.edu](mailto:jingsan@penmedicine.upenn.edu)

112 Akriti Mishra MS, Department of Medical Ethics and Health Policy, 423 Guardian Drive, 1121  
113 Blockley Hall, Philadelphia PA, 19104, Office: 215-573-5654,  
114 [akritim@pennmedicine.upenn.edu](mailto:akritim@pennmedicine.upenn.edu)

115 **New York University**

116 Andrea Troxel, ScB, (Co-Investigator), Department of Population Health, New York University,  
117 650 First Avenue, Fifth Floor 521, New York, NY 10016, Office: 212-263-6527,  
118 [andrea.troxel@nyumc.org](mailto:andrea.troxel@nyumc.org)

119 **Advocate Health Care**

120 Lee Sacks, MD, Advocate Aurora Health, 3075 Highland Parkway, Suite 600, Downers Grove,  
121 IL 60515, Office: 630-929-8707, [lee.sacks@advocatehealth.com](mailto:lee.sacks@advocatehealth.com)

122 Pankaj Patel, MD, Advocate Physician Partners, 3075 Highland Parkway, Suite 600, Downers  
123 Grove, IL 60515, [Pankaj.patel@advocatehealth.com](mailto:Pankaj.patel@advocatehealth.com)

124 Carrie Nelson, MD, MS, FAAFP, Advocate Physician Partners, 1701 Gold Road, Suite 2-1100,  
125 Rolling Meadows, IL 60008, Office: 847-635-4196, [carrie.nelson@advocatehealth.com](mailto:carrie.nelson@advocatehealth.com)

126 Don Calcagno, MBA, Advocate Physician Partners, 1701 Golf Road, Rolling Meadows, IL  
127 60008, Office: 847-635-3396, [don.calcagno@advocatehealth.com](mailto:don.calcagno@advocatehealth.com)

128 Salvatore Vittore, Advocate Physician Partners, 1701 Golf Road, Suite 2-1100, Rolling  
129 Meadows, IL 60008, Office: 847-635-3378, [Salvatore.vittore@advocatehealth.com](mailto:Salvatore.vittore@advocatehealth.com)

130 Kara Sokol, Advocate Physician Partners, 1701 Golf Road, Rolling Meadows, IL 60008, Office:  
131 847-699-4306, [kara.sokol@advocatehealth.com](mailto:kara.sokol@advocatehealth.com)

132 Kevin Weng, Advocate Physician Partners, 1701 W. Golf Road, Suite 2-1100, Rolling Meadows,  
133 IL 60008, Office: 847-699-4305, [kevin.weng@advocatehealth.com](mailto:kevin.weng@advocatehealth.com)

134 Nichia McDowald, Advocate Physician Partners, 1701 Golf Road, Suite 2-1100, Rolling  
135 Meadows, IL, 60008, [Nichia.mcdowald@advocatehealth.com](mailto:Nichia.mcdowald@advocatehealth.com)

136 Paul Crawford, MD, Advocate Physician Partners, 10725 South Western, Chicago, Illinois  
137 60643, Office: 708-952-3040, [paul.crawford@advocatehealth.com](mailto:paul.crawford@advocatehealth.com)

138

139 **PARTICIPATING STUDY SITES**

140

141 Advocate Physician Partners: Pankaj Patel, MD, Advocate Physician Partners, 3075 Highland  
142 Parkway, Suite 600, Downers Grove, IL 60515, [Pankaj.patel@advocatehealth.com](mailto:Pankaj.patel@advocatehealth.com)

143

144

145 **PRÉCIS**

146

147 **Study Title**

148 A Pragmatic Policy Trial Testing Larger Bonus Sizes and the Behavioral Economic Principles of  
149 Loss Aversion and Increased Social Pressure in Physician Pay-for-Performance

150 **Objectives**

151 The key goal of this randomized trial is to test whether using behavioral economic principles in  
152 addition to larger bonus sizes in the structure of provider incentives and the practice environment  
153 may improve provider performance, especially in settings that are moving away from fee-for-  
154 service reimbursement and fragmented care towards new payment and delivery models that  
155 emphasize coordination of care and provider accountability. We also directly evaluate the effect  
156 of increasing bonus sizes in an accompanying non-randomized study.

157 **Design and Outcomes**

158 This research project will conduct a prospectively designed experimental evaluation of the  
159 impact of social pressure by varying individual and group incentives and the comparative  
160 effectiveness of endowment loss aversion on provider physician performance via a multi-arm  
161 experiment and a prospectively designed, non-randomized observational study of the impact of  
162 increasing bonus sizes. We will complement the quantitative RCT evaluations with pre- and  
163 post-intervention qualitative surveys of physicians and patients to better understand the influence  
164 on behavior change, culture, acceptability of the incentive program, and patient reported  
165 outcomes on health and experience. These evaluations will contribute toward an empirical  
166 foundation for informing the re-design of existing physician incentive programs and  
167 implementation of new policies, by evaluating the impact of promising behavioral economics  
168 principles in improving quality metrics and patient experience in the context of provider payment  
169 – above and beyond increasing bonus sizes themselves. The examination of the effect of larger  
170 bonus sizes will be conducted in a separate but related observational analysis, since all  
171 physicians in the randomized trial will receive larger bonus sizes, using a design that evaluates  
172 changes in the 3 intervention arms combined compared to a group of propensity matched  
173 physicians who did not receive an increase in bonus size.

174 **Interventions and Duration**

175 Experimentally evaluate the impact of *social pressure* and the effectiveness of endowment *loss*  
176 *aversion* on physician performance in addition to a larger bonus size.

177 Utilize an observational, quasi-experimental design to assess the impact of providing a larger  
178 bonus size in the P4P program.

179 This multi-arm Randomized Controlled Trial (RCT) will compare the effectiveness of  
180 endowment loss aversion incentive design and increased group incentives to enhance social  
181 pressure for physician financial incentives in improving quality of care. Quality of care will be

182 measured using the specified HEDIS-based patient-level metrics. The intervention will consist of  
183 an active phase of 12 months and sites will be randomized equally to two interventions and an  
184 “active control” arm (Arm 1) with the existing incentive design but larger bonus size. The  
185 intervention arms 2 (endowment loss aversion) and 3 (social pressure) will build off of the  
186 current incentive program. Arm 2 will change the framing of incentives to physicians from the  
187 existing framing to a potentially more powerful loss aversion method called ‘the endowment  
188 effect.’ Arm 3 will increase the percentage of the individual physician incentive based on his or  
189 her group practice’s performance to 50% from the 30% in the current program (this will  
190 correspondingly decrease the 70% paid based on individual performance to 50%). All arms will  
191 include cluster randomization of physicians by site.

192 We will select and randomize Advocate practice sites from the Trinity PHO equally to the three  
193 study arms (Arms 1 – 3) described above. Baseline data will be drawn for the years 2014-2015  
194 for the physicians in each arm with the active phase of the trial starting on January 1, 2016 and  
195 running for 12 months.

196 All participants will be tracked at baseline at 3, 6, 9, and 12 months during the interventions and  
197 provided periodic Proformas (Figure 1 and 2) with performance on specific metrics and overall.

198 This will be accompanied by an observational analysis compared all patients and physicians  
199 included in the RCT with patients of propensity-matched physicians who did not receive a larger  
200 bonus size or participate in the randomized trial. Physicians will be matched on demographics as  
201 well as pre-trial performance level and pre-trial trend in performance.

### 202 **Sample Size and Population**

203 We anticipate enrolling approximately 20 practice sites and 40 physicians and 1400 patients per  
204 group. Randomization will occur at the level of the physician practice. We assume an average  
205 office size of 2, and a conservative intraclass correlation (ICC) estimate of 0.25. We wish to be  
206 able to detect a clinically meaningful increase in quality metric score achievement of at least 5  
207 percent between the control arm and either the endowment loss aversion group or the increased  
208 social pressure group. Using 80% power to detect differences in the change in proportion of  
209 evidence based measures received between any incentive group and control of 5% will require  
210 approximately 3,420 participants (1,140 per group).

211 The observational analysis will utilize a matched design, therefore we anticipate analyzing an  
212 additional 20 practice sites and 40 physicians in comparison to those enrolled in the RCT.

213



214 **STUDY PROTOCOL**

215

216 **1. Study Objectives**

217

218 **1.1 Primary Objective**

219 Experimentally evaluate the impact of social pressure and the effectiveness of endowment loss  
220 aversion on physician performance above and beyond larger bonus size.

221 Use a complementary, prospective observational, quasi-experimental design to directly evaluate  
222 the impact of larger bonus size.

223 **1.2 Secondary Objectives**

224 Evaluate how practice behavior changes by looking at pre and post survey data.

225 Evaluate patient satisfaction to assess their satisfaction with their physician throughout the trial.

226

227 **2. Background on Behavioral Economics, Physician Incentives, and Primary Study**

228 **Focus**

229

230 **2.1 Background**

231

232 The American health care system is undergoing tremendous transition. The objective is to  
233 control total health care costs while improving or maintaining quality of care. A fundamental  
234 aspect of the transition is payment reform. While fee-for-service payment (FFS) remains the  
235 dominant form of payment, the last few years have seen a major shift toward alternative payment  
236 methods as highlighted by Secretary Burwell’s recent announcement that Medicare and  
237 Medicaid will be rapidly moving away from FFS in the next few years.<sup>1</sup> There are now hundreds  
238 of organizations, such as hospitals and large physician groups functioning as accountable care  
239 organizations (ACOs) and participating in bundles (e.g. the CMS Bundled Payment for Care  
240 Improvement (BPCI) program), that are participating in shared-savings payment programs and  
241 “two-sided risk contracts,” such as in the CMS Pioneer ACO program. At the opposite end of  
242 the payment spectrum from FFS are fully capitated delivery systems, of which there are  
243 relatively few. While they differ in exact mechanisms, these models share a common strategy:  
244 tying provider (physician, hospital, health system) reimbursement to performance on costs and  
245 outcomes. Furthermore, they have been paired with powerful regulatory concessions by relaxing  
246 aspects of Stark Laws and Anti-kickback statutes to allow for gainsharing with physicians.

247 Optimal provider payments will vary not only with an organization’s position along the payment  
248 spectrum but also as a function of its particular mission, culture, local competitive environment,

249 patient population, and contractual and financial relationship with providers. To promote  
250 appropriate high-quality utilization informed by evidence-based guidelines, payers in FFS  
251 environments have often supplemented their payment mechanisms with pay-for-performance  
252 (P4P) strategies. But to date, P4P has demonstrated little effect on physician behavior.<sup>2-5</sup> This  
253 result probably reflects the relatively small size of the financial incentives employed in most pay-  
254 for-performance programs to date, but may also reflect important design limitations.

255 Traditional P4P and most other provider payment programs have been developed through trial-  
256 and-error, partially informed by the best science of human motivation, such as behavioral  
257 economics. Behavioral economics has revealed systematic ways in which human behavior is  
258 shaped not merely by the size of incentives, but also by their design and how they are delivered.

## 259 **2.2 Study Rationale**

260  
261 There have been limited efforts to experimentally test ways to improve on P4P programs with  
262 little, if any, consideration of behavioral economics. These have included mostly retrospective  
263 analysis of demonstration projects and only few randomized controlled trial (RCT) of physicians  
264 in a similar policy context to date.<sup>6-9</sup> In the most relevant trial, individual incentives were  
265 compared with team-based, practice level incentives and a combined incentive program;  
266 individual incentives were found to be most effective in adherence to hypertension guidelines.  
267 The maximum size of incentives for primary care physicians (PCPs) was approximately 1.6% of  
268 annual income, with nurse team members receiving above \$500 in incentives in the team and  
269 combined arms.<sup>16</sup> Effects were modest and did not persist beyond 12 months. This study did not  
270 incorporate the behavioral economic principles described above in altering how incentives were  
271 framed or paid, how performance was communicated, utilizing social comparisons between  
272 providers, or the use of goal gradients.

273 In general, efforts to reform provider payment have been built on the assumption that providers  
274 are largely rational and have not utilized insights from behavioral economics.<sup>10, 11</sup> The principles  
275 of behavioral economics have been successfully used in the design of patient incentives for  
276 smoking, substance abuse, obesity, and drug adherence.<sup>12-20</sup> Less is known about designing  
277 incentives to influence physician care patterns. This could also partly explain the lackluster  
278 results of many existing efforts aimed at designing physician incentives to promote high-quality,  
279 high-value care.

280 Behavioral economics can provide insights into how to improve the effectiveness of physician  
281 incentives to deliver higher quality and lower cost care. Its principles can be implemented  
282 through creative design of incentives that can be tested in the context of provider incentives with  
283 insights into decision errors that can be leveraged to improve the effectiveness of financial  
284 incentives. Examples include unbundling incentives from other payments to make them more  
285 salient (mental accounting), designing incentives to provide immediate vs. more delayed rewards  
286 due to the importance of immediate gratification, loss framing, and avoidance of choice

287 overload. Behavioral economics has also emphasized thoughtfully structuring the choice  
288 environment and the use of non-financial rewards and penalties to shape behavior. By applying  
289 these behavioral economics principles to physician incentives, policymakers, payers, and health  
290 systems alike could improve the effectiveness of incentives by making them more salient to  
291 physicians and better aligned with performance goals, without increasing the overall allocation  
292 of funds for incentive payments. For example, the ACO and BPCI gainsharing policy where  
293 incentives are provided at the organization level, could be an important target for incentive re-  
294 design. However, to what extent applying behavioral economic principles versus increasing  
295 bonus sizes to be more significant, and whether these have synergistic effects, is unknown.

### 296 **3. Study Design**

297  
298 Based on recommendations from the academic team members and health system partner, we will  
299 pursue a staged approach to further develop our initiative using behavioral economics and  
300 provider payment. Arm 1 will serve as the ‘active control’ in which physician incentives  
301 payments are 70% individual / 30% group-based and delivered with the current design, though  
302 with a larger bonus size (increase of ~32% on average). Arm 2 will test loss aversion by creating  
303 an endowment effect for the physician incentives, keeping the 70% individual / 30% group-based  
304 components constant. This will be done by giving providers 50% of the bonus at the beginning  
305 of the year in a virtual account and making retention of incentive dollars conditional on  
306 performance. This would provide an alternative to the once-yearly payment currently provided  
307 by Advocate. The incentive amount (bonus size) will also be increased similarly by ~32% in this  
308 Arm. Arm 3 will test enhanced social pressure by increasing the group-based performance  
309 component of the individual physician’s incentive payment to 50% (with other 50% based on  
310 individual performance) and will keep the other incentive design constant, along with the larger  
311 bonus size. In all Arms 1-3, the physicians will receive an additional 32% or approximately  
312 \$3500 more incentive dollars available (this will be provided across all 155 physicians in the  
313 Trinity Physician-Hospital Organization regardless of participation in the study).

314 The experiment will be conducted in the Trinity Physician-Hospital Organization (PHO), a  
315 member of Advocate Physician Partners because Advocate Physician Partners has already  
316 implemented a performance incentive program and are very interested in improving their  
317 incentive program. Furthermore, Trinity is a lower performing PHO within Advocate, without  
318 obvious explanatory factors for the discrepant results, for which the leadership is very interested  
319 in trying new methods of incentive design to improve quality of care. It comprises 164 Trinity  
320 physicians eligible for incentive distribution for the 2014 performance year, of which 155 are  
321 affiliated physicians and 9 are employed physicians. These physician provided care through over  
322 35,000 unique outpatient encounters in 2014. The Trinity PHO ranks last amongst the 10  
323 Advocate PHOs in physician –level quality score attainment (as measured by Advocate), with  
324 achievement of 69% of the possible score while the next highest PHO attains 74% and the  
325 highest achieves 91%; the mean score is 86.7%. Within the Trinity PHO, there is significant

326 variation in physician performance with mean score (as a percent) of 69% with a standard  
327 deviation of 12.8%, and a range from 37.6% to 100%. Furthermore, the patient satisfaction with  
328 outpatient visits trails that of other PHOs, with Trinity physicians in the 23rd percentile  
329 nationally versus 48th percentile across the other PHOs. The physicians are distributed across 81  
330 practices with 65 solo practices and 10 practices of 4 physicians or more.

331 Quality of care will be measured using the metrics described in Table 1. The intervention will  
332 consist of an active phase of 12 months and physicians will be randomized equally to two  
333 interventions and an “active control” arm (Arm 1). Specifically, randomization will occur at the  
334 physician practice site level and the randomization will be stratified by specialty vs. primary  
335 care, prior performance (low vs. not low) and practice site size (solo vs. multi-physician).  
336 Baseline data will be drawn for the years 2014-2015 for the physicians in each aim with the  
337 active phase of the trial starting on January 1, 2016 and running for 12 months.

338 The data for the physician scores will be readily available given that the performance incentive  
339 program being studied already exists and the experiment will only modify the way physicians  
340 receive financial incentives or modify how those incentives are calculated. We will capture the  
341 data through Advocate’s platform for administering the program, which includes reporting tools  
342 and software to incorporate Cerner electronic medical records (EMR) and population health  
343 management (PHM) data along with pharmacy data.

344 Patient reported data will be collected directly from Advocate leveraging the existing survey  
345 infrastructure in place for quality measurement. Advocate currently receives raw survey results  
346 at the patient-question level from the survey administrator Press Ganey, Inc. Press Ganey mails  
347 a paper survey to each patient after every visit to an Advocate affiliated or employed physician  
348 and codes the results in an electronic database. The survey tool utilized will be the Clinician and  
349 Group Consumer Assessment of Healthcare Providers and Systems (CG-CAHPS) survey. To  
350 increase the response rate higher than 22 percent, we will provide a \$15 participation incentive to  
351 each patient who returns a completed survey. A random sample of 1500 unique patient visits  
352 (from over 30,000) will be recruited, stratified across practice sites, physicians, and specialties.  
353 This patient survey will be administered by the Advocate HealthCare vendor Professional  
354 Research Consultants.

355 Physician surveys will be administered via Survey Monkey by Advocate, which is Advocate’s  
356 usual process for surveying physicians.

357 Penn’s Health Services Research Data Center (HSRDC) will serve as the coordinating center for  
358 data acquisition and protection for all data. All data will be transmitted to the HSRDC by secure  
359 FTP.

360 **4. Selection and Enrollment of Participants**

361  
362 **4.1 Inclusion Criteria**

363  
364 We will include all Advocate practice site that have the following characteristics: participation in  
365 the Trinity PHO that participates in the Advocate Clinically Integrated Network (CIN), one or  
366 more full-time physician, participation in the incentive program, use of Cerner EHR and registry  
367 function, and participation in Press Ganey survey program. Practices will be included regardless  
368 of average patient panel size, average patient complexity and heterogeneity, geographic/zip code  
369 demographic and socioeconomic characteristics, and primary care only vs. multi-specialty group.  
370 Physicians who were affiliated with Advocate, but not employed by Advocate, will be included.  
371 Physicians with uniquely attributed patients with one of five chronic diseases (asthma, chronic  
372 obstructive pulmonary disease, diabetes, coronary artery disease or ischemic vascular disease,  
373 congestive heart failure) will be able to participate, with preference given to primary care  
374 physicians if there is shared attribution with specialists (i.e., patients will be uniquely attributed  
375 to physicians). Only patients with one of the five chronic diseases will be included.

376 **4.2 Exclusion Criteria**

377  
378 Sites will be excluded if they do not use an EHR, have not participated in quality reporting, have  
379 not practiced with Advocate for the entire pre-intervention period, have never been part of a pay-  
380 for-performance incentive program in the past, or do not have eligible patients. Patients will be  
381 excluded if they have not been attributed to an Advocate Physician Partners physician for more  
382 than twelve continuous months.

383 **4.3 Study Enrollment Procedures**

384  
385 Patients will first be assigned to a practice site based on the location of their elected PCP, or in  
386 the event of no election to the practice site with the greatest number of EMR encounters for that  
387 patient. Furthermore, patients will be attributed to their elected PCP or the physician at the  
388 assigned site with the greatest number of EMR encounters for that patient. This will allow for  
389 inclusion of specialists when a patient does not have an elected PCP and the greatest number of  
390 EMR encounters is to a specialist physician. Because sites will be randomized (not patients or  
391 providers), there will be clear delineation of a patient to a provider in each arm with no confusion  
392 when a patient sees multiple providers. We are requesting a waiver of written informed consent  
393 for physicians since there is no appreciable risk to physicians in participating (the purpose of the  
394 incentive program changes is to increase quality and incomes).

395

396 **5. Study Interventions**

397

## 398 **5.1 Interventions, Administration, and Duration**

399 The intervention period will be 12 months in length for all participants.

## 400 **5.2 Handling of Study Intervention**

401

402 The following interventions will be compared:

403

404 The *larger bonus size* intervention provided maximum P4P bonuses larger than previous years  
405 by \$3,355 per physician, representing an approximate 32 percent increase in bonus size for the  
406 average physician. Quality metrics and scoring methodology will be left unchanged. This  
407 intervention represents an ‘active control’ in which the physicians will receive larger bonuses  
408 than physicians not participating in the RCT (and larger than they themselves received the prior  
409 year); no additional feedback on performance on financial expectations will be provided other  
410 than the year-end proforma as per standard Advocate practice.

411

412 The *loss aversion plus larger bonus size intervention* will include the larger maximum bonus  
413 plus pre-funded incentives in a virtual health system bank account in the physician’s name. The  
414 pre-funded incentives, which are 50% of the expected incentives based on prior year  
415 performance, will be placed into the virtual account on January 1, 2016; physicians will be able  
416 to access these dollars by requesting them in writing by email or regular mail from the Advocate  
417 network chief financial officer (who usually sends out the bonus checks to them on a yearly  
418 basis). Physicians in this intervention group will receive four additional proformas (Figure 1) in  
419 February, July, September, and November of 2016 that indicate the total amount of pre-funded  
420 incentive dollars, the amount accessed year-to-date, the projected 2016 incentive bonus size  
421 based on current performance, and the residual unearned incentive.

422 The *increased social pressure plus larger bonus size* intervention will include the increased  
423 maximum bonus but also will change the composite quality score from 70% based on individual  
424 score and 30% based on PHO score (the average of all individual scores in the group as defined  
425 by PHO) to 50% individual and 50% group (here defined as all physicians in the same  
426 intervention group). Physicians in this intervention group will also receive four additional  
427 proformas (Figure 2) on the same dates as above that indicate the additional P4P bonus dollars  
428 that would be earned by the 20 percentage point increase in the weighting given to group score  
429 as well as an unblinded list of physicians with performance scores on two of the quality  
430 measures. Physicians with scores below the performance threshold will be highlighted.

431 The comparison group for the observational, quasi-experimental comparison will not receive any  
432 changes to their incentive.

## 433 **6. Study Procedures**

434

435 **6.1 Study Timeline**

436

| <b>Study Task</b>                                                  | <b>Timeline</b>       |
|--------------------------------------------------------------------|-----------------------|
| Period of Performance Begins                                       | November 2015         |
| Administer pre-trial qualitative surveys to physician participants | December 2015         |
| Experiment begins                                                  | January 2016          |
| Proformas sent to loss aversion and increased social pressure arms | January 2016          |
| Proformas sent to loss aversion and increased social pressure arms | April 2016            |
| Evaluate preliminary results                                       | June 2016             |
| Begin patient surveys                                              | July 2016             |
| Proformas sent to loss aversion and increased social pressure arms | August 2016           |
| Proformas sent to loss aversion and increased social pressure arms | November 2016         |
| Complete experiment                                                | December 2016         |
| Complete patient survey mailings                                   | December 2016         |
| Administer post-trial qualitative physician surveys                | January 2017          |
| Aim 2 Quantitative and Qualitative Analysis                        | February – April 2017 |

437

438 **6.3 Description of Evaluation**

439

440 We are not recruiting patients for this study, therefore we are requesting a waiver of consent.  
441 There is no harm to the persons whose data we are reviewing and it would be impossible to  
442 obtain consent on them at this point. The waiver of consent is being requested because the  
443 research presents no more than minimal risk to subjects and involves no procedures for which  
444 written consent is normally required outside of the research context.

445 **7. Safety Assessments**

446

447 **7.1 Safety Monitoring**

448

449 Safety monitoring per standard Advocate clinical practice and governance will occur under the  
450 standard quality improvement project protocols.

451 **8. Statistical Considerations**

452

## 453 **8.1 General Design and Sample Size**

454  
455 We are proposing Advocate as our health system partner because it has implemented a  
456 performance incentive program that incorporates immediacy through an online registry that  
457 provides real-time feedback, who are organized into practice sites of differing size and  
458 proportion of Advocate patients (for affiliates). Furthermore, Advocate Physician Partners brings  
459 together more than 6,300 affiliated and employed physicians and 12 hospitals in the Advocate  
460 Health Care System, providing significant scale to the evaluation effort. We anticipate enrolling  
461 approximately 20 practice sites and 40 physicians and 1400 patients per group. Randomization  
462 will occur at the level of the physician practice. We assume an average office size of 2, and a  
463 conservative intraclass correlation (ICC) estimate of 0.25. We wish to be able to detect a  
464 clinically meaningful increase in quality metric score achievement of at least 5 percent between  
465 the control arm and either the loss aversion group or the increased social pressure group. Using  
466 80% power to detect differences in the change in proportion of evidence based measures  
467 received between any incentive group and control of 5% will require approximately 3,420  
468 participants (1,140 per group). The observational, quasi-experimental analysis will include an  
469 additional approximately 20 practice sites and 40 physicians.

## 470 **8.2 Sample Size and Randomization**

471  
472 Eligible affiliated physicians in the RCT will be randomized by practice site to active control or  
473 two intervention groups in a 1:1:1 ratio, stratified by primary care versus specialist (family  
474 medicine, internal medicine, or pediatrics versus or other specialty that included cardiology,  
475 nephrology, or obstetrics and gynecology). Study participants and operational staff will not be  
476 blinded to group assignment, because knowledge of the incentives is essential to their  
477 mechanism, but study investigators and data analysts will remain blinded until all follow-up data  
478 are obtained and primary analyses are finalized.

## 479 **8.3 Outcomes**

480

### 481 *8.3.1 Primary Outcome*

482 The primary outcome will be the impact of physician performance on patient chronic disease  
483 quality metrics from baseline to 12 months. This will be a patient-level analysis of the proportion  
484 of applicable chronic disease and preventive evidence-based measures within the P4P program  
485 meeting or exceeding national HEDIS benchmarks at the patient level, representing a patient's  
486 view of the proportion of evidence-based care received. This primary outcome will apply to both  
487 the randomized trial and the observational study.

### 488 *8.3.2 Secondary Outcome*

489 Our secondary outcomes of interest include incentive payout and individual quality metrics  
490 within the composite.



## 491 **8.4 Data Analyses**

492  
493 Our initial approach to analysis will be a descriptive comparison of site, physician participant,  
494 and patient attributes across the arms. Continuous variables will be described by means and  
495 standard deviations, or by medians and interquartile ranges if they appear non-normal (where  
496 appropriate, such variables will be transformed). The primary analysis will consist of an intent-  
497 to-treat approach using a linear regression analysis of the effect of treatment assignment on the  
498 outcome of change in the patient-level composite quality measure from baseline to 12 months.  
499 The patient-level composite quality measure score will reflect the same metrics to which  
500 financial incentives are tied for the chronic disease patients (Table 2). We will examine linear  
501 regression diagnostics using standard approaches to ensure appropriate model fit. Standard errors  
502 will be corrected for heteroscedasticity and clustered at the physician level. Additional  
503 exploratory analyses will use longitudinal models to assess the series of quality measures over  
504 time, to determine the shape of the trajectory and whether those trajectories differ by treatment  
505 group, though we do not anticipate any inter-group differences prior to the intervention. All  
506 hypothesis tests will be two-sided.

507 The primary analysis will consist of an unadjusted comparison of the change in patient-level  
508 composite quality metric score by treatment arm, using indicator variables for the three active  
509 treatments. An initial set of hypothesis tests will compare each active arm to the control arm,  
510 using a Bonferroni-corrected, two-sided p-value of 0.017 to determine statistical significance.  
511 We will conduct further testing of any treatment arms that show significant differences with the  
512 control. We will use generalized linear regression for all quality metrics. When performing  
513 analysis of Aims 2 and 3 we will also consider a subset of performance metrics within CI  
514 composite including chronic disease, population health/wellness, and screening categories as  
515 these are more likely to be influenced by practices within a 1 year timeframe. This will also  
516 enable us to evaluate heterogeneity in movement across measures.

517 The observational, matched quasi-experimental study will utilize a difference-in-differences  
518 design with the same primary outcome, control variables, and generalized linear model as the  
519 RCT analysis; however, because of a lack of randomization it will include physician fixed-  
520 effects and will utilize a set of matched APP physicians who did not participate in the RCT and  
521 are not part of the Trinity PHO. Propensity matching will be performed on physician  
522 demographics, 2015 performance, and the trend in performance for 2014-2015. Standard errors  
523 will be clustered at the patient level given multiple repeated measures at the patient level.<sup>21</sup>

## 524 **9. Data Storage, Privacy, and Disclosure**

### 525 526 **9.1 Data Storage**

527  
528 All study data for this project will be stored on the secure/ firewalled servers of the HRSDC Data

529 Center, in data files that will be protected by multiple password layers. These data servers are  
530 maintained in a guarded facility behind several locked doors, with very limited physical access  
531 rights. They are also cyber-protected by extensive firewalls and multiple layers of  
532 communication encryption. Electronic access rights are carefully controlled by University of  
533 Pennsylvania system managers.

## 534 **9.2 Privacy**

535

536 We will receive de-identified data from Advocate Health. No patient PHI will be transferred, as  
537 all patient level data will be de-identified. Physicians will be tracked over time with a unique  
538 identifier. All of these data will be stored in an encrypted database that conforms to applicable  
539 data security standards.

## 540 **9.3 Data Disclosure**

541

542 The data will not be disclosed to anyone outside of the research team. De-identified data may be  
543 shared, if requested by The Commonwealth Fund, our sponsor, in the event of an audit, or the  
544 Office Human Research protections at the University of Pennsylvania.

## 545 **10. Participant Rights and Confidentiality**

546

### 547 **10.1 Institutional Review Board (IRB) Review**

548

549 The study protocol and the waiver of consent document will be reviewed and approved by the  
550 University of Pennsylvania's Institutional Review Board (IRB) and the Advocate Health System  
551 Institutional Review Board.

552 The Advocate Health System IRB initially approved the protocol and waiver of consent  
553 document on December 3, 2015.

554 The University of Pennsylvania's IRB initially approved the protocol and waiver of consent  
555 document on December 7, 2015.

### 556 **10.2 Informed Consent Forms**

557

558 There is a waiver of informed consent for physicians and patients.

### 559 **10.3 Study Discontinuation**

560

561 Advocate will follow its standard quality improvement procedures and discontinue per its  
562 protocols.

563 **11. Publication of Research Findings**

564

565 Publication of results from our research will follow the NIH Public Access Policy, which  
566 requires that we submit to the National Library of Medicine's PubMed Central an electronic  
567 version of final, peer-reviewed manuscripts upon acceptance for publication, to be made publicly  
568 available no later than 12 months after the official date of publication.

569  
570  
571

## SUMMARY OF CHANGES TO ORIGINAL PROTOCOL

### Changes before the start of the intervention period:

| Original Protocol                                                                | Change to Protocol                                                                                                                                                                                                                                                                                                                                                                                                                                                                                                                         | Date of Change   |
|----------------------------------------------------------------------------------|--------------------------------------------------------------------------------------------------------------------------------------------------------------------------------------------------------------------------------------------------------------------------------------------------------------------------------------------------------------------------------------------------------------------------------------------------------------------------------------------------------------------------------------------|------------------|
| Arm 3 named Social Pressure                                                      | Arm 3 named increased social pressure and larger bonus size                                                                                                                                                                                                                                                                                                                                                                                                                                                                                | December 1, 2015 |
| No changes to bonus size                                                         | All 3 arms to receive increased bonus size as a part of the observational study design                                                                                                                                                                                                                                                                                                                                                                                                                                                     | December 1, 2015 |
| No observational study of larger bonus size                                      | Prospectively design observational, quasi-experimental study added to directly test impact of larger bonus size                                                                                                                                                                                                                                                                                                                                                                                                                            | December 1, 2015 |
| Primary outcome of physician level Advocate Clinical Integration composite score | The primary outcome will be the impact of physician performance on patient chronic disease quality metrics from baseline to 12 months. This will be a patient-level analysis of the proportion of applicable chronic disease and preventive evidence-based measures within the P4P program meeting or exceeding national HEDIS benchmarks at the patient level, representing a patient's view of the proportion of evidence-based care received. This primary outcome will apply to both the randomized trial and the observational study. | December 1, 2015 |
| Include all patients                                                             | Include patients with one of five chronic diseases (asthma, chronic obstructive pulmonary disease, diabetes, coronary artery disease or ischemic vascular disease, congestive heart failure) – because data not available for all non-chronic disease patients in registry data                                                                                                                                                                                                                                                            | December 1, 2015 |
| Randomize specialists                                                            | Randomize all specialists to receive intervention, but only include those with attributed patients who are not also attributed to a PCP in the analysis                                                                                                                                                                                                                                                                                                                                                                                    | December 1, 2015 |

572

573 **Changes after the start of the intervention period:**

574

| <b>Original Protocol</b>                       | <b>Change to Protocol</b>                                             | <b>Date of Change</b> |
|------------------------------------------------|-----------------------------------------------------------------------|-----------------------|
| Arm 2 named endowment loss framing             | Arm 2 re-named loss aversion plus larger bonus size                   | January 2016          |
| Proformas to be sent to physicians in January  | Proformas sent to physicians in February                              | January 2016          |
| Proformas to be sent to physicians in April    | Proformas sent to physician in July                                   | April 2016            |
| Patient surveys to be conducted by Press Ganey | Patients surveys to be conducted by Professional Research Consultants | April 2016            |
| Proformas to be sent to physicians in August   | Proformas sent to physicians in September                             | September 2016        |
| Secondary outcome to analyze incentive payout  | Did not analyze the incentive payout as a secondary outcome           | January 2017          |

575

576

577 **PHYSICIAN SURVEY - PRE**

578

579 0. Baseline Qs on attitude toward financial incentives

- 580 1) Physicians should be rewarded when they provide higher quality care  
581 2) Financial incentives for physicians are an effective way to improve the quality of health care  
582 3) Financial incentives are more effective as an incentive compared to non-financial incentives such  
583 as peer-recognition  
584 4) The 2015 CI program for physicians is an effective way to improve the quality of health care

585 I. Teamwork/Collaboration

- 586 5) I am able to get the cooperation of other physicians as needed to obtain the 2015 CI financial  
587 incentive  
588 6) I am able to get the cooperation of support staff as needed to obtain the 2015 CI financial  
589 incentive  
590 7) How effective are each of the following in improving the quality of care you provide to your  
591 patients?  
592 a. Teamwork or communication among physician or other medical care professionals is  
593 effective in improving the quality of care I provide.  
594 b. The level of patient access to preventative care and health education is effective in  
595 improving the quality of care I provide.  
596 c. Care coordination among other physicians and care managers for chronically ill patients  
597 is effective in improving the quality of care I provide

598 II. Financial Salience

- 599 8) The 2015 CI program represents an opportunity for me to increase my income  
600 9) The 2015 CI program is sufficiently large to compensate for expenditures that might be necessary  
601 in order to meet the quality target  
602 10) The timing of when I receive the 2015 APP CI incentive distribution makes me focus on  
603 improving my CI score  
604 11) The portion of the 2015 CI financial incentive based on group/Trinity PHO performance  
605 increases my focus on improving my 2015 CI score.

606 III. Practice Environment/Support/Resources - including practice improvement, QI, IT, data

- 607 12) I am satisfied with my practice.  
608 13) My practice makes more monetary and non-monetary resources available compared to last year.  
609 14) Trinity PHO leadership invests extra time and effort to help me obtain the 2015 CI financial  
610 incentive.  
611 15) My support staff invests extra time and effort to help me achieve the 2015 CI financial incentive.  
612 16) My APP patients have adequate access to necessary ancillary services.  
613 17) There are enough support staff in my practice.

614 IV. Awareness/Understanding + Acceptability/Control

- 615 18) I have adequate information about the scoring system used to compute the 2015 CI financial  
616 incentive amount
- 617 19) I get useful feedback regarding my progress toward improving my 2015 CI score.
- 618 20) Physicians within Trinity PHO are on a level playing field for obtaining the 2015 CI financial  
619 incentive.
- 620 21) The actions necessary to obtain the 2015 CI financial incentive are largely within my control.
- 621 22) Because of the clinical characteristics of my APP patients, it will be more difficult for me to  
622 obtain the 2015 CI financial incentive than it will be for other physicians within Trinity PHO.

623 V. Individual impact on clinical behavior

- 624 23) Because of the 2015 CI program, I invest extra time and effort in the care of my APP patients
- 625 24) Because of the 2015 CI program, I have changed my practice behavior to obtain this financial  
626 incentive.
- 627 25) Because of the 2015 CI program, overall, my APP patients are getting better care.
- 628 26) I would be just as focused on improving my CI score without 2015 CI financial incentive.
- 629 27) Obtaining the 2015 CI financial incentive brings me favorable recognition from my colleagues
- 630 28) Knowing my CI score helps me focus my time and effort constructively.

631 VI. Unintended Consequences

- 632 29) The effort required to obtain the 2015 CI financial incentive leads me to focus less on non-APP  
633 patients in my practice.
- 634 30) Efforts to obtain the 2015 CI financial incentive hinder me from providing other essential medical  
635 services to my APP patients.
- 636 31) The effort required to obtain the 2015 CI financial incentive has improved the care of non-APP  
637 patients in my practice

638

639 **PHYSICIAN SURVEY - POST**

640 0. Baseline Qs on attitude toward financial incentives

- 641 1) Physicians should be rewarded when they provide higher quality care
- 642 2) Financial incentives for physicians are an effective way to improve the quality of health care
- 643 3) Financial incentives are more effective as an incentive compared to non-financial incentives such
- 644 as peer-recognition
- 645 4) The 2016 CI program for physicians is an effective way to improve the quality of health care

646 I. Teamwork/Collaboration

- 647 5) I was able to get the cooperation of other physicians as needed to obtain the 2016 CI financial
- 648 incentive
- 649 6) I was able to get the cooperation of support staff as needed to obtain the 2016 CI financial
- 650 incentive
- 651 7) How effective were each of the following in improving the quality of care you provide to your
- 652 patients?
- 653 a. Teamwork or communication among physician or other medical care professionals was
- 654 effective in improving the quality of care I provide.
- 655 b. The level of patient access to preventative care and health education was effective in
- 656 improving the quality of care I provide.
- 657 c. Care coordination among other physicians and care managers for chronically ill patients
- 658 was effective in improving the quality of care I provide

659 II. Financial Salience

- 660 8) The 2016 CI program represented an opportunity for me to increase my income
- 661 9) The 2016 CI program was sufficiently large enough to compensate for expenditures that might be
- 662 necessary in order to meet the quality target
- 663 10) The timing of when I received the 2016 APP CI incentive distribution made e me focus on
- 664 improving my CI score
- 665 11) The portion of the 2016 CI financial incentive based on group/Trinity PHO performance
- 666 increased my focus on improving my 2016 CI score

667 III. Practice Environment/Support/Resources

- 668 12) I am satisfied with my practice.
- 669 13) My practice made more monetary and non-monetary resources available compared to last year.
- 670 14) Trinity PHO leadership invested extra time and effort to help me obtain the 2016 CI financial
- 671 incentive.
- 672 15) My support staff invested extra time and effort to help me achieve the 2016 CI financial
- 673 incentive.
- 674 16) My APP patients had adequate access to necessary ancillary services.
- 675 17) There are enough support staff in my practice.

676 IV. Awareness/Understanding + Acceptability/Control



- 677 18) I had adequate information about the scoring system used to compute the 2016 CI financial  
678 incentive amount
- 679 19) I got useful feedback regarding my progress toward improving my 2016 CI score.
- 680 20) Physicians within Trinity PHO were on a level playing field for obtaining the 2016 CI financial  
681 incentive.
- 682 21) The actions necessary to obtain the 2016 CI financial incentive were largely within my control.
- 683 22) Because of the clinical characteristics of my APP patients, it was more difficult for me to obtain  
684 the 2016 CI financial incentive than it was for other physicians within Trinity PHO.

685 V. Individual impact on clinical behavior

- 686 23) Because of the 2016 CI program, I invested extra time and effort in the care of my APP patients
- 687 24) Because of the 2016 CI program, I changed my practice behavior to obtain this financial  
688 incentive.
- 689 25) Because of the 2016 CI program, overall, my APP patients received better care.
- 690 26) I would have been just as focused on improving my CI score without 2016 CI financial incentive.
- 691 27) Obtaining the 2016 CI financial incentive brought me favorable recognition from my colleagues
- 692 28) Knowing my CI score helped me focus my time and effort constructively.

693 VI. Unintended Consequences

- 694 29) The effort required to obtain the 2016 CI financial incentive led me to focus less on non-APP  
695 patients in my practice.
- 696 30) Efforts to obtain the 2016 CI financial incentive hindered me from providing other essential  
697 medical services to my APP patients.
- 698 31) The effort required to obtain the 2016 CI financial incentive improved the care of non-APP  
699 patients in my practice

700

701 **ADDITIONAL METHODS FROM PAPER**

702

703 **Pre-Trial Exclusions**

704

705 Fifty one specialist physicians had no uniquely attributed patients and so contributed no  
706 information to the trial.

707 **Data Abstraction**

708

709 The Advocate data analytics team created extracts from the Cerner EHR registry and billing data  
710 for each practice site that contained the data elements necessary to compute the outcome  
711 measures for all patients attributed to Trinity physicians. These records were transferred to the  
712 University of Pennsylvania, where study staff checked data quality and constructed an analytic  
713 data set.

714 We excluded patients attributed to physicians who did not have at least 1 year of experience as  
715 an Advocate network member to allow for adequate historical data.

716 **Bootstrapping for Risk-Standardized Primary Outcome Measures**

717

718 Only measures for which data were collected in both 2015 and 2016 were included. Within each  
719 imputation, we bootstrapped 150 samples from the data, ensuring group balance, and then  
720 calculated the mean and standard error for the estimated proportion of evidence-based measures  
721 received by each patient.<sup>22</sup> For the RCT, we then used average values for each covariate to  
722 compute the risk-standardized value, while for the cohort study we used the ‘marginalized  
723 approach’ in which we assigned every patient to both the treatment and comparison groups and  
724 used the difference to estimate the risk-standardized value. Estimates were combined using the  
725 standard rules from Rubin.<sup>23</sup>

726

727 **DEFINITION OF CLINICAL INTEGRATION SCORE**

728

729 A composite measure, called the clinical integration (CI) score, is a weighted average of  
730 measures with an emphasis on chronic disease measures with categories such as coronary artery  
731 disease, diabetes care, controlling high blood pressure; population Health measures including  
732 screening for cancer, substance use, and depression; and patient satisfaction.

733

734

735

736 REFERENCES

737

738 <sup>1</sup> Burwell, Sylvia M. "Setting value-based payment goals—HHS efforts to improve US health  
739 care." *New England Journal of Medicine* 372.10 (2015): 897-899.

740 <sup>2</sup> Rosenthal MB, Frank RG, Li Z, and Epstein AM. Early experience with pay-for-  
741 performance: From concept to practice. *JAMA*. 2005; 294(14):1788-1793.

742 <sup>3</sup> Rosenthal MB. Beyond pay for performance—emerging models of provider-payment  
743 reform. *N Engl J Med*. 2008; 359(12):1197-1200.

744 <sup>4</sup> Van Herck, Pieter, et al. "Systematic review: effects, design choices, and context of pay-for-  
745 performance in health care." *BMC health services research* 10.1 (2010): 247.

746 <sup>5</sup> Eijkenaar, Frank, et al. "Effects of pay for performance in health care: a systematic review of  
747 systematic reviews." *Health policy* 110.2 (2013): 115-130.

748 <sup>6</sup> Petersen, Laura A., et al. "Effects of individual physician-level and practice-level financial  
749 incentives on hypertension care: a randomized trial." *JAMA* 310.10 (2013): 1042-1050.

750 <sup>7</sup> Petersen LA, Woodard LD, Urech T, Daw C, Sookanan S. Does pay-for-performance  
751 improve the quality of health care? *Ann Intern Med*. 2006; 145(4):265-272.

752 <sup>8</sup> Scott A, Sivey P, Ait Ouakrim D, et al. The effect of financial incentives on the quality of  
753 health care provided by primary care physicians. *Cochrane Database Syst Rev*. 2011;  
754 9(9):CD008451.

755 <sup>9</sup> Houle SK, McAlister FA, Jackevicius CA, Chuck AW, Tsuyuki RT. Does performance-  
756 based remuneration for individual health care practitioners affect patient care? a systematic  
757 review. *Ann Intern Med*. 2012; 157(12):889-899.

758 <sup>10</sup> Thaler RH and Sunstein CR. *Nudge: Improving Decisions about Health, Wealth, and*  
759 *Happiness*. New Haven: Yale University Press, 2008.

760 <sup>11</sup> Kahneman D. *Thinking, Fast and Slow*. New York: Farrar, Straus and Giroux, 2011.

761 <sup>12</sup> Volpp KG, Troxel AB, Pauly MV, et al. A randomized controlled trial of financial incentives  
762 for smoking cessation. *N Engl J Med*. 2009; 360:699-709.

763 <sup>13</sup> Volpp KG, John LK, Troxel AB, Norton LA, Fassbender JE, and Loewenstein G. Financial  
764 incentive-based approaches for weight loss: A randomized trial. *JAMA*. 2008; 300:2631-  
765 2637.

766 <sup>14</sup> Volpp KG, Loewenstein G, Troxel AB, et al. A test of financial incentives to improve

- 767 Warfarin adherence. *BMC Health Serv Res.* 2008; 8:272.
- 768 <sup>15</sup> Sutherland K, Christianson JB, and Leatherman S. Impact of targeted financial incentives on  
769 personal health behavior: A review of the literature. *Med Care Res Rev.* 2008; 65.6 suppl:  
770 36S-78S.
- 771 <sup>16</sup> Giuffrida A and Torgerson DJ. Should we pay the patient? Review of financial incentives to  
772 enhance patient compliance. *BMJ.* 1998; 315(7110):703-707.
- 773 <sup>17</sup> Kane RL, Johnson PE, Town RJ, and Butler M. A structured review of the effect of  
774 economic incentives on consumers' preventive behavior. *Am J Prev Med.* 2004;27(4):327-  
775 352.
- 776 <sup>18</sup> Stitzer ML, Petry NM, and Peirce J. Motivational incentives research in the National Drug  
777 Abuse Treatment Clinical Trials Network. *J Subst Abuse Treat.* 2010; 38(Suppl. 1):S61-69.
- 778 <sup>19</sup> Jeffery RW, Gerber WM, Rosenthal BS, Lindquist RA. Monetary Contracts in Weight  
779 Control: Effectiveness of Group and Individual Contracts of Varying Size. *J Consult Clin*  
780 *Psychol.* 1983; 51(2):242-248.
- 781 <sup>20</sup> Jeffery RW. Financial incentives and weight control. *Prev Med.* 2012; 55:S61-S67.
- 782 <sup>21</sup> Angrist, Joshua D., and Jörn-Steffen Pischke. Mostly harmless econometrics: An empiricist's  
783 companion. Princeton university press, 2008.
- 784 <sup>22</sup> Muller, Clemma J., and Richard F. MacLehose. "Estimating predicted probabilities from  
785 logistic regression: different methods correspond to different target populations."  
786 *International journal of epidemiology* 43.3 (2014): 962-970.
- 787 <sup>23</sup> Rubin, Donald B. Multiple imputation for nonresponse in surveys. Vol. 81. John Wiley &  
788 Sons, 2004.

789

790

791

792

793

794

795

796

## Supplement 2. Additional Appendix Materials

### eFIGURE 1 - Loss Aversion with Larger Bonus Size Arm

#### EXAMPLE OF PROFORMAS SENT TO PROVIDERS:

##### SUPPLEMENTAL PRO FORMA for YOUR PRE-FUNDED INCENTIVE ACCOUNT\*

The graph below shows the size (in dollars) of your pre-funded 2016 CI Incentive account. Below the graph, you will find the amount of your 2016 CI Incentive that you can access in advance.

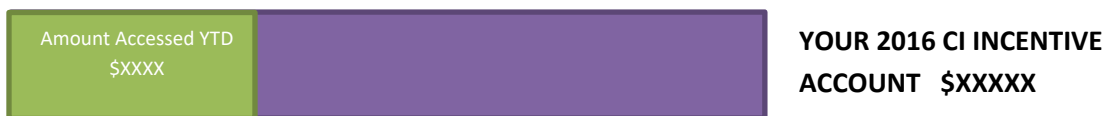

Eligible pre-funded 2016 CI incentive amount for advanced access: \$YYYY

Remaining incentive dollars you may draw out in advance: \$ZZZZ

##### YOUR PROJECTED 2016 CI INCENTIVE BASED ON YTD PERFORMANCE IS:

###### Jan 2016

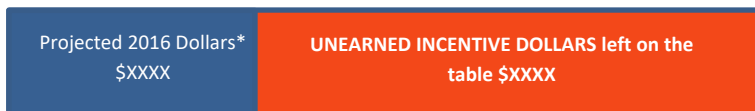

\*If you perform the same as last year you will earn this much in 2016 and leave the corresponding amount in red on the table.

###### Q1

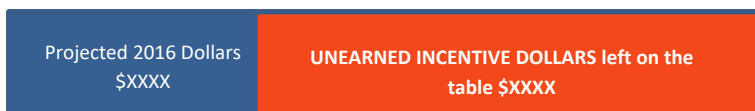

###### Q2

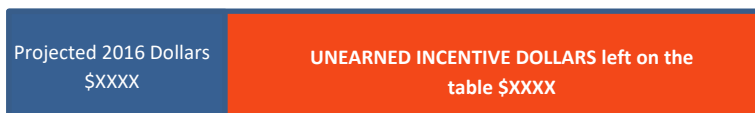

###### Q3

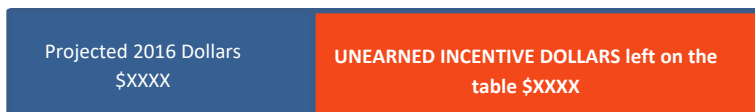

###### Q4

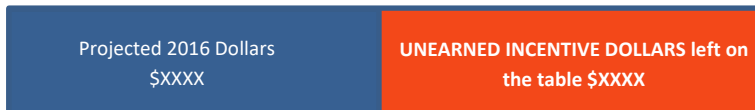

\*NOTE: Projections are based on changes in performance holding other aspects equal and are based on latest available data (2014 CI Year Incentive Opportunity amount). Any significant changes in attributed members (for the PCPs) or allowable billings/unique patients (for the Specialists) will impact the actual 2016 CI incentive performance and opportunity, and correspondingly the accuracy of the projections on this Supplemental ProForma.

831 **eFIGURE 2 - Increased Social Pressure with Larger Bonus Size**  
 832 **Arm**

833 **SUPPLEMENTAL PRO FORMA for ENHANCED GROUP INCENTIVE\***

834 The bar graph below shows the additional incentive dollars you can receive through group performance versus prior years.  
 835 - Blue Bar: In 2014, you earned \$3,000 of your CI incentive from the PHO pool based on the Trinity PHO score of 79%.  
 836 - Red Bar: In the current 2016 year, with the new program design and if your group performs the same as 2014, you would  
 837 earn \$4,590 of your CI incentive based on your group performance.  
 838 - Green Bar: In the current 2016 year, with the new program design and if the group performance increases to 90%, you would  
 839 earn \$5,095 of your CI incentive based on your group performance.  
 840 That means, in 2016 if your group performs at 90%, you could earn \$2,095 more than you did in 2014 based on your group  
 841 performance.  
 842 "Group" refers to the performance of the physicians in Arm 3 Enhanced Group Incentive *only*.  
 843

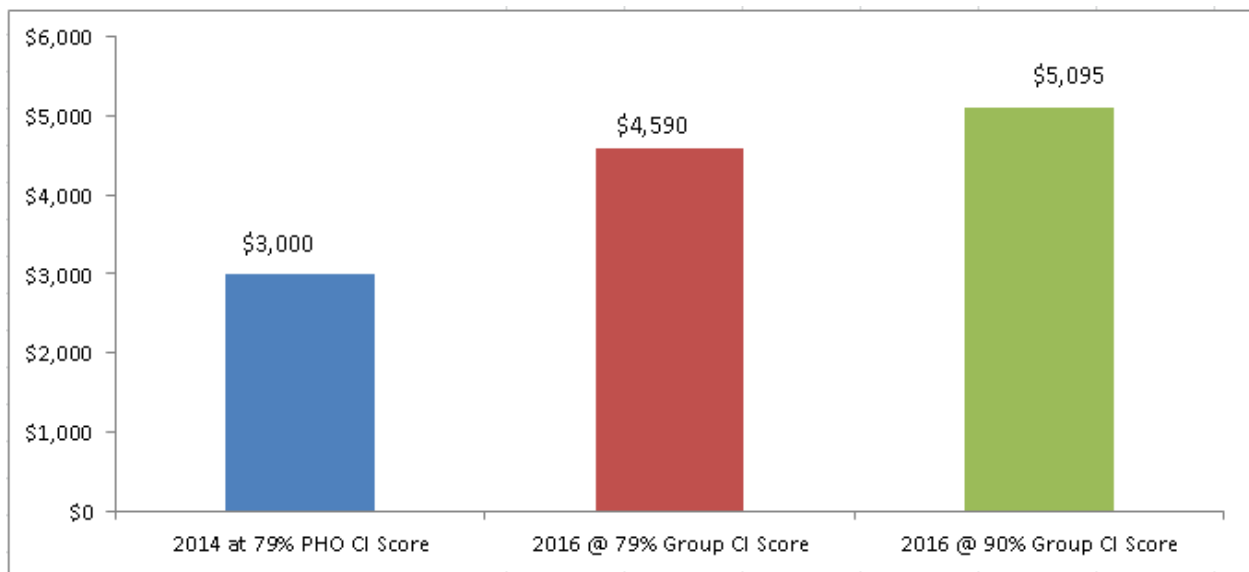

844  
 845 

The individual component of your 2016 CI opportunity is decreased by \$YYY.

  
 846

847 The current Group (Arm 3) performance shows the following metrics that are hurting the Group CI Score:

| <u>COMPLETION RATES</u> |               |
|-------------------------|---------------|
| Physician Name          | Practice Site |
| 1.                      |               |
| 2.                      |               |
| 3.                      |               |
| 4.                      |               |
| 5.                      |               |
| 6.                      |               |
| 7.                      |               |
| 8.                      |               |
| 9.                      |               |
| 10.                     |               |

| <u>ASTHMA MANAGEMENT</u> |               |
|--------------------------|---------------|
| Physician Name           | Practice Site |
| 1.                       |               |
| 2.                       |               |
| 3.                       |               |
| 4.                       |               |
| 5.                       |               |

| <u>COLORECTAL CANCER SCREENING</u> |               |
|------------------------------------|---------------|
| Physician Name                     | Practice Site |
| 1.                                 |               |
| 2.                                 |               |
| 3.                                 |               |
| 4.                                 |               |
| 5.                                 |               |

**eTABLE 1: Measures in Composite Quality Measure Score for Chronic Disease Patients**

| <b>Chronic Disease Registry</b>                                                                                                                | <b>Advocate Measure Name</b>      | <b>Study Measure Name</b>         | <b>Measure Definition</b>                                                                                                                                                                                                                                                               |
|------------------------------------------------------------------------------------------------------------------------------------------------|-----------------------------------|-----------------------------------|-----------------------------------------------------------------------------------------------------------------------------------------------------------------------------------------------------------------------------------------------------------------------------------------|
| Asthma Care                                                                                                                                    | Asthma Action Plan                | Asthma Action Plan                | Eligible patients 5-64 years of age. A documented action plan containing: a list of medications to take for asthma, instructions regarding how the patient should monitor asthma, and instructions regarding what changes in treatment should result from observed changes in symptoms. |
| Asthma Care                                                                                                                                    | Asthma Control Treatment Assessed | Asthma Control Treatment Assessed | Eligible patients 5-64 years of age. Control assessment performed and documented in the medical record                                                                                                                                                                                  |
| Asthma Care                                                                                                                                    | Asthma Medication Management      | Asthma Medication Management      | Eligible patients 5-64 years of age with asthma. Documentation indicating at least one prescription for an asthma controller medication filled during the measurement period.                                                                                                           |
| Asthma Care, Diabetes Care, Congestive Heart Failure, Chronic Obstructive Pulmonary Disease, Ischemic Vascular Disease/Coronary Artery Disease | Tobacco Use Cessation Counseling  | Tobacco Use Cessation Counseling  | Patient has tobacco Cessation Counseling and Treatment completed in measurement period.                                                                                                                                                                                                 |
| Asthma Care, Diabetes Care, Congestive Heart Failure, Chronic Obstructive Pulmonary Disease, Ischemic Vascular Disease/Coronary Artery Disease | Tobacco Use Assessment            | Tobacco Use Assessment            | Patient has documentation of being identified as a Tobacco Non-User or User.                                                                                                                                                                                                            |



|                                                                  |                                         |                                             |                                                                                                                                                                                                                                                                                  |
|------------------------------------------------------------------|-----------------------------------------|---------------------------------------------|----------------------------------------------------------------------------------------------------------------------------------------------------------------------------------------------------------------------------------------------------------------------------------|
| Disease                                                          |                                         |                                             |                                                                                                                                                                                                                                                                                  |
| Diabetes Care                                                    | Percent HbA1c Test                      | Hemoglobin A1c Testing                      | Eligible patients ages $\geq 19$ and $< 76$ . Patient has an HbA1c test performed and resulted during the current measurement period and documented.                                                                                                                             |
| Diabetes Care                                                    | Percent with A1c result $< 8$           | HbA1c Control ( $< 8\%$ )                   | Eligible patients ages $\geq 19$ and $< 76$ . Patient has HbA1c test performed and resulted during the current measurement period and documented with the lowest result being less $< 8\%$ .                                                                                     |
| Diabetes Care                                                    | Percent with A1c result $> 9$           | HbA1c Poor Control ( $> 9\%$ )              | Eligible patients ages $\geq 19$ and $< 76$ . Patient has an HbA1c test performed and resulted during the current measurement period with the result being $\geq 9\%$ or patient did not receive test in current measurement period.                                             |
| Diabetes Care                                                    | Annual Eye Exam                         | Diabetes: Eye Exam Performed                | Eligible patients ages $\geq 19$ and $< 76$ . Patient has a retinal eye exam performed and documented.                                                                                                                                                                           |
| Diabetes Care                                                    | Nephropathy Monitoring                  | Diabetes: Medical Attention for Nephropathy | Eligible patients ages $\geq 19$ and $< 76$ . The patient has a nephropathy screening test performed and reported during the current measurement period or patient has evidence of ACE inhibitor/ARB therapy administration or patient has a documented evidence of Nephropathy. |
| Diabetes Care, Ischemic Vascular Disease/Coronary Artery Disease | Blood Pressure Control $< 140/90$ mm/Hg | Blood Pressure Control ( $< 140/90$ mm/Hg)  | Eligible patients $\geq 19$ and $< 76$ . Patient has blood pressure taken and reported during the current measurement period and documented.                                                                                                                                     |
| Diabetes Care                                                    | Foot Exam                               | Diabetes: Foot Exam                         | Eligible patients $\geq 19$ and $< 76$ . Patient has a foot exam performed and resulted during the measurement period and                                                                                                                                                        |

|                                                                                            |                                                                  |                                                                  |                                                                                                                                                                                                           |
|--------------------------------------------------------------------------------------------|------------------------------------------------------------------|------------------------------------------------------------------|-----------------------------------------------------------------------------------------------------------------------------------------------------------------------------------------------------------|
|                                                                                            |                                                                  |                                                                  | documented.                                                                                                                                                                                               |
| Diabetes Care, Ischemic Vascular Disease/Coronary Artery Disease                           | Body Mass Index Assessment                                       | Adult BMI                                                        | Eligible patients $\geq 19$ and $< 76$ . Patient has a Body Mass Index or calculated BMI performed and reported during current measurement period.                                                        |
| Diabetes Care, Congestive Heart Failure, Ischemic Vascular Disease/Coronary Artery Disease | Depression Screening and Follow Up Plan                          | Depression Screening and Follow Up Plan                          | Eligible patients $\geq 18$ years. Patient has a depression screening performed during the measurement period. If positive screening, then patient must have a follow up action plan documented.          |
| Congestive Heart Failure                                                                   | CHF Appropriate Medication Outpatient – Beta Blockers            | CHF Appropriate Medication Outpatient – Beta Blockers            | Eligible patients $\geq 19$ years. Patient has a beta blocker therapy prescribed during the current measurement period and documented.                                                                    |
| Congestive Heart Failure                                                                   | CHF Appropriate Medication Outpatient – ACEi or ARBs             | CHF Appropriate Medication Outpatient – ACEi or ARBs             | Eligible patients $\geq 19$ years. Patient has an ACEi or ARB medication prescribed during the current measurement period and documented.                                                                 |
| Congestive Heart Failure                                                                   | Documentation of Designated Decision Maker for Medical Care Form | Documentation of Designated Decision Maker for Medical Care Form | Eligible patients $\geq 65$ years. Patient has a documented Designated Decision Maker for Medical Care.                                                                                                   |
| Chronic Obstructive Pulmonary Disease                                                      | COPD Spirometry Evaluation                                       | COPD Spirometry Evaluation                                       | Eligible patients $\geq 40$ years. Patient had a spirometry evaluation performed and documented.                                                                                                          |
| Ischemic Vascular Disease/Coronary Artery Disease                                          | IVD/CAD – Use of Anti-Platelet Medication                        | IVD/CAD – Use of Anti-Platelet Medication                        | Eligible patients $\geq 19$ years. Patient has documentation of an anti-platelet medication during the measurement year.                                                                                  |
| Ischemic Vascular Disease/Coronary Artery Disease                                          | IVD/CAD – Blood Pressure Measurement                             | IVD/CAD – Blood Pressure Measurement                             | Eligible patients $> 19$ years. Patient has a systolic blood pressure value taken during the current measurement period and a diastolic blood pressure value from the same date and patient does not have |

|  |  |  |                                                                   |
|--|--|--|-------------------------------------------------------------------|
|  |  |  | an emergency visit or an inpatient visit with the same encounter. |
|--|--|--|-------------------------------------------------------------------|

852 **eAPPENDIX 1 - Propensity Matching Methods and Graphs for the Area of Common Support**

853  
854 Propensity matching was performed in a two-step approach because not all physicians had historic trend data. In the first step, we used a logistic  
855 model with a dependent variable of participation in the Trinity PHO and independent variables of physician demographics, 2015 (pre-)  
856 composite quality score (on measures included in the study), and the trend from 2014-2015. This resulted in a match for 28 of the 33 physicians.  
857 The remaining 5 physicians were matched using a similar model without the 2014-2015 trend because these physicians did not have adequate  
858 historical data. In total, all 33 physicians in the RCT who received larger bonus sizes were matched to a physician in the no larger bonus size  
859 group in a 1:1 match using a 2 digit match.

860 The area of common support is shown below using kernel density.

861 **eFIGURE 3**

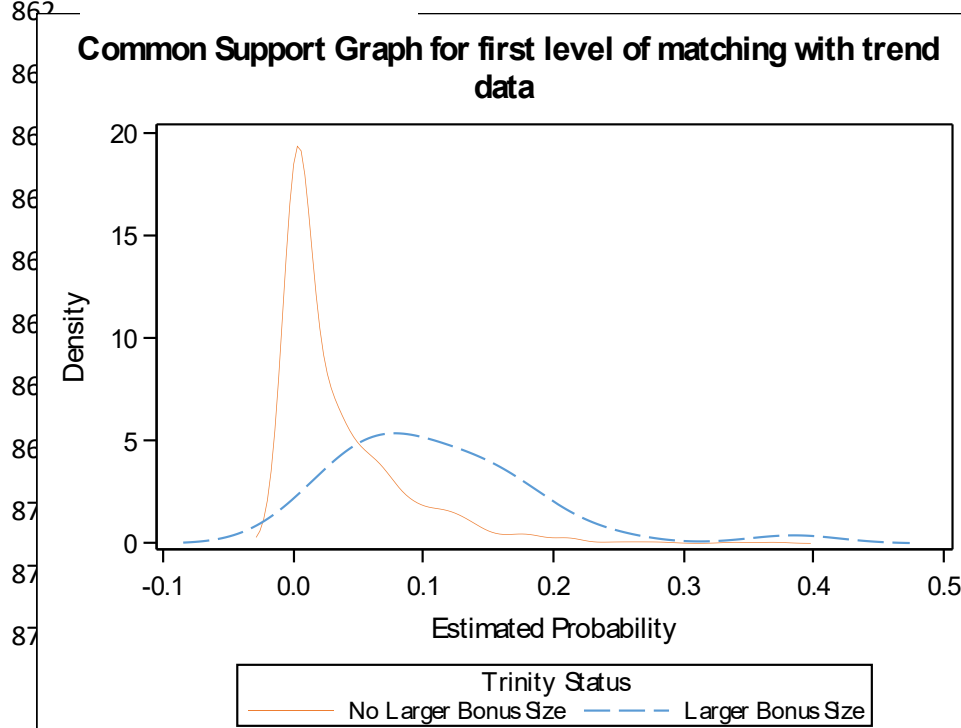

**eFIGURE 4**

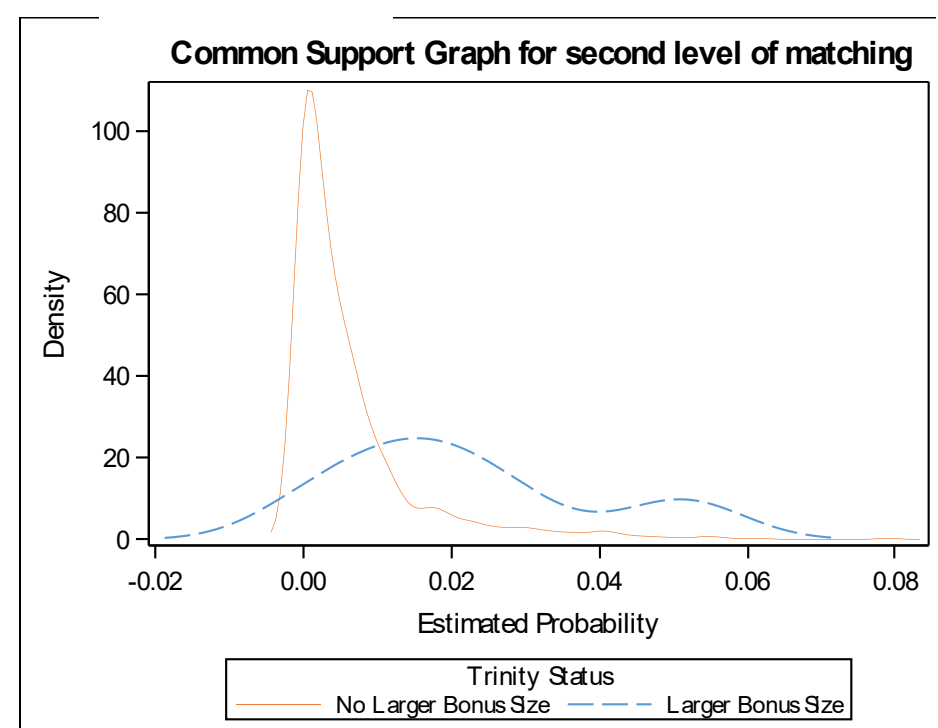

## 873 **eAPPENDIX 2: Test of Trend Methods**

874 We compared the trend in physician performance for Larger Bonus Size and matched No Larger Bonus  
875 Size physicians prior to the 2016 intervention. Eleven measures from the main analysis existed beginning  
876 in 2011.<sup>1</sup>

- 877 • Diabetes: Eye Exam Performed
- 878 • Diabetes: HbA1c Control (<8%)
- 879 • Diabetes: HbA1c Poor Control (>9%)
- 880 • Diabetes: Hemoglobin A1c Testing
- 881 • Diabetes: Medical Attention for Nephropathy
- 882 • CHF Appropriate Medication Outpatient – ACEi or ARBs
- 883 • CHF Appropriate Medication Outpatient – Beta Blockers
- 884 • IVD - Adult BMI
- 885 • IVD - Blood Pressure Control (<140/90 mm/Hg)
- 886 • IVD– Blood Pressure Measurement
- 887 • IVD– Use of Anti-Platelet Medication
- 888

889 We constructed a physician-year performance measure defined as the number of patients meeting  
890 evidence-based quality measures divided by the number of patients who should meet the quality  
891 measure. Note this definition allows a patient to be double counted if they are relevant for multiple  
892 measures. The performance measure was defined using physician level registry data from 2011 and  
893 2012 and patient level registry data from 2014 and 2015.

894 To test the trend in performance we ran the following linear regression clustering at the physician level  
895 and weighting by number of measures (when indicated):

$$y = \alpha_0 + \alpha_1 LBS + \alpha_2 Year + \alpha_3 LBS \times Year + \epsilon$$

896

897 Where year is a continuous variable and trinity indicates whether the physician is in the Larger Bonus  
898 Size (LBS) group.<sup>2</sup> Physicians are included only if they are included in the main analysis.

899 This analysis demonstrated no significant differences in the trend in performance (Year x Trinity  
900 interaction term) in the years prior to the intervention.

---

<sup>1</sup> The Ischemic Vascular disease measures were for a broader set of patients in the main analysis.

<sup>2</sup> Year is centered at 2010 to ease interpretation of the coefficient on Trinity

901 **eTABLE 2. Complete unadjusted results of randomized controlled trial**

| Study Measure                                                    | Increased Social Pressure + Larger Bonus Size |            |             |            |            | Loss Aversion + Larger Bonus Size |            |             |            |            |
|------------------------------------------------------------------|-----------------------------------------------|------------|-------------|------------|------------|-----------------------------------|------------|-------------|------------|------------|
|                                                                  | # Patients                                    | 2015       | # Patients  | 2016       | Difference | # Patients                        | 2015       | # Patients  | 2016       | Difference |
| <b>Overall</b>                                                   | <b>1496</b>                                   | <b>85%</b> | <b>1496</b> | <b>89%</b> | <b>4%</b>  | <b>1387</b>                       | <b>84%</b> | <b>1387</b> | <b>88%</b> | <b>4%</b>  |
| Asthma Action Plan                                               | 92                                            | 86%        | 72          | 91%        | 5%         | 46                                | 78%        | 42          | 87%        | 9%         |
| Asthma Control Treatment Assessed                                | 92                                            | 84%        | 72          | 91%        | 8%         | 46                                | 78%        | 42          | 86%        | 8%         |
| Asthma Medication Management                                     | 53                                            | 94%        | 35          | 97%        | 2%         | 19                                | 95%        | 20          | 94%        | 0%         |
| Adult BMI                                                        | 737                                           | 96%        | 768         | 95%        | -1%        | 622                               | 98%        | 669         | 96%        | -2%        |
| Blood Pressure Control (<140/90 mm/Hg)                           | 1388                                          | 83%        | 1406        | 84%        | 1%         | 1307                              | 85%        | 1326        | 85%        | 0%         |
| IVD/CAD – Blood Pressure Measurement                             | 1228                                          | 96%        | 1290        | 96%        | 0%         | 1252                              | 98%        | 1259        | 98%        | 0%         |
| COPD Spirometry Evaluation                                       | 239                                           | 54%        | 288         | 65%        | 11%        | 199                               | 72%        | 221         | 81%        | 9%         |
| Diabetes: Eye Exam Performed                                     | 586                                           | 62%        | 608         | 68%        | 5%         | 416                               | 55%        | 430         | 64%        | 9%         |
| Diabetes: Foot Exam                                              | 585                                           | 74%        | 608         | 89%        | 15%        | 416                               | 88%        | 430         | 87%        | -1%        |
| HbA1c Control (<8%)                                              | 586                                           | 69%        | 608         | 72%        | 4%         | 416                               | 61%        | 430         | 66%        | 5%         |
| HbA1c Poor Control (>9%)                                         | 586                                           | 77%        | 608         | 82%        | 5%         | 416                               | 73%        | 430         | 76%        | 3%         |
| Hemoglobin A1c Testing                                           | 586                                           | 96%        | 608         | 94%        | -2%        | 416                               | 94%        | 430         | 94%        | 0%         |
| Diabetes: Medical Attention for Nephropathy                      | 585                                           | 96%        | 608         | 96%        | 0%         | 416                               | 97%        | 430         | 97%        | -1%        |
| CHF Appropriate Medication Outpatient – ACEi or ARBs             | 90                                            | 80%        | 64          | 92%        | 12%        | 88                                | 90%        | 75          | 91%        | 1%         |
| CHF Appropriate Medication Outpatient – Beta Blockers            | 26                                            | 54%        | 18          | 100%       | 46%        | 28                                | 89%        | 23          | 93%        | 4%         |
| IVD/CAD – Use of Anti-Platelet Medication                        | 198                                           | 80%        | 220         | 91%        | 11%        | 242                               | 90%        | 273         | 91%        | 2%         |
| Depression Screening and Follow Up Plan                          | 1233                                          | 92%        | 1233        | 99%        | 6%         | 1172                              | 97%        | 1172        | 99%        | 2%         |
| Documentation of Designated Decision Maker for Medical Care Form | 539                                           | 37%        | 584         | 72%        | 36%        | 672                               | 10%        | 682         | 42%        | 32%        |
| Tobacco Use Cessation Counseling                                 | 334                                           | 87%        | 317         | 92%        | 5%         | 352                               | 80%        | 269         | 89%        | 9%         |
| Tobacco Use Assessment                                           | 1486                                          | 97%        | 1487        | 99%        | 1%         | 1384                              | 98%        | 1384        | 99%        | 1%         |

902

903

904 Abbreviations: BMI, Body Mass Index; IVD, Ischemic Vascular Disease; CAD, Coronary Artery Disease; COPD, Chronic Obstructive Pulmonary  
 905 Disease; HbA1c, Hemoglobin A1c; CHF, Congestive Heart Failure; ACEi, Angiotensin-converting enzyme (ACE) inhibitor; ARBs, Angiotensin  
 906 II receptor blockers

907

908

909

910

911

912

913

914

915

916

917

918

919

920

921

922

923

924

925

926

927

928

929

930

| Larger Bonus Size Only |      |            |      |            | Adjusted Pair-Wise Comparison <sup>a</sup> |                           |                          |
|------------------------|------|------------|------|------------|--------------------------------------------|---------------------------|--------------------------|
| # Patients             | 2015 | # Patients | 2016 | Difference | ISP vs LA<br>2016 vs 2015                  | ISP vs AC<br>2016 vs 2015 | LA vs AC<br>2016 vs 2015 |
| 864                    | 88%  | 864        | 92%  | 4%         |                                            |                           |                          |
| 55                     | 95%  | 52         | 94%  | -1%        | >0.99                                      | >0.99                     | >0.99                    |
| 55                     | 93%  | 52         | 93%  | 0%         | >0.99                                      | >0.99                     | >0.99                    |
| 23                     | 100% | 21         | 100% | 0%         | >0.99                                      | >0.99                     | >0.99                    |
| 316                    | 92%  | 359        | 96%  | 4%         | >0.99                                      | >0.99                     | 0.73                     |
| 671                    | 84%  | 730        | 89%  | 5%         | >0.99                                      | >0.99                     | >0.99                    |
| 608                    | 95%  | 667        | 98%  | 3%         | >0.99                                      | 0.32                      | 0.03 <sup>a</sup>        |
| 248                    | 81%  | 265        | 87%  | 6%         | >0.99                                      | >0.99                     | >0.99                    |
| 231                    | 69%  | 261        | 76%  | 7%         | >0.99                                      | >0.99                     | >0.99                    |
| 231                    | 85%  | 261        | 88%  | 3%         | 0.91                                       | >0.99                     | >0.99                    |
| 231                    | 58%  | 261        | 71%  | 12%        | >0.99                                      | >0.99                     | >0.99                    |
| 231                    | 70%  | 261        | 80%  | 10%        | >0.99                                      | >0.99                     | >0.99                    |
| 231                    | 89%  | 261        | 93%  | 4%         | >0.99                                      | >0.99                     | >0.99                    |
| 231                    | 97%  | 261        | 97%  | 0%         | >0.99                                      | >0.99                     | >0.99                    |
| 35                     | 91%  | 49         | 91%  | 0%         | >0.99                                      | >0.99                     | >0.99                    |
| 12                     | 83%  | 13         | 98%  | 15%        | 0.15                                       | >0.99                     | >0.99                    |
| 107                    | 93%  | 111        | 94%  | 1%         | >0.99                                      | >0.99                     | 0.98                     |
| 622                    | 95%  | 665        | 99%  | 3%         | 0.80                                       | >0.99                     | >0.99                    |
| 296                    | 54%  | 344        | 79%  | 24%        | >0.99                                      | >0.99                     | >0.99                    |
| 163                    | 90%  | 179        | 93%  | 3%         | >0.99                                      | >0.99                     | >0.99                    |
| 845                    | 98%  | 845        | 98%  | 0%         | >0.99                                      | >0.99                     | >0.99                    |

<sup>a</sup> Reported p-values for pairwise comparisons of the primary outcome of change in proportion of applicable chronic disease and preventive evidence-based measures meeting or exceeding benchmarks at the patient level use the Holm-Bonferroni correction. Multiple imputation was used for the approximately 11% of participants missing follow-up quality metric scores.

931

932 **eTABLE 3. Complete unadjusted results of cohort study**

| Study Measure                                                           | Larger Bonus Size |            |             |            |            | No Larger Bonus Size (comparison group) |            |             |            |            | Adjusted Pair-Wise Comparison |
|-------------------------------------------------------------------------|-------------------|------------|-------------|------------|------------|-----------------------------------------|------------|-------------|------------|------------|-------------------------------|
|                                                                         | N                 | 2015       | N           | 2016       | Difference | N                                       | 2015       | N           | 2016       | Difference | Adjusted P-Value <sup>a</sup> |
| <b>Overall</b>                                                          | <b>3747</b>       | <b>85%</b> | <b>3747</b> | <b>89%</b> | <b>4%</b>  | <b>4371</b>                             | <b>86%</b> | <b>4371</b> | <b>88%</b> | <b>2%</b>  |                               |
| <b>Asthma Action Plan</b>                                               | 193               | 87%        | 166         | 91%        | 4%         | 164                                     | 84%        | 128         | 88%        | 4%         | >0.99                         |
| <b>Asthma Control Treatment Assessed</b>                                | 193               | 85%        | 166         | 90%        | 5%         | 164                                     | 81%        | 129         | 88%        | 7%         | 0.95                          |
| <b>Asthma Medication Management</b>                                     | 95                | 96%        | 76          | 97%        | 1%         | 104                                     | 93%        | 74          | 100%       | 7%         | >0.99                         |
| <b>Adult BMI</b>                                                        | 1675              | 96%        | 1796        | 96%        | 0%         | 2119                                    | 97%        | 2168        | 95%        | -2%        | 0.12                          |
| <b>Blood Pressure Control (&lt;140/90 mm/Hg)</b>                        | 3366              | 84%        | 3462        | 86%        | 2%         | 4086                                    | 89%        | 4114        | 84%        | -4%        | 0.00                          |
| <b>IVD/CAD – Blood Pressure Measurement</b>                             | 3088              | 97%        | 3216        | 97%        | 0%         | 3820                                    | 98%        | 3891        | 97%        | -1%        | 0.16                          |
| <b>COPD Spirometry Evaluation</b>                                       | 686               | 69%        | 774         | 77%        | 8%         | 745                                     | 69%        | 855         | 72%        | 3%         | 0.08                          |
| <b>Diabetes: Eye Exam Performed</b>                                     | 1233              | 61%        | 1299        | 68%        | 7%         | 1235                                    | 64%        | 1218        | 66%        | 2%         | 0.16                          |
| <b>Diabetes: Foot Exam</b>                                              | 1232              | 81%        | 1299        | 88%        | 8%         | 1235                                    | 81%        | 1218        | 82%        | 0%         | 0.00                          |
| <b>HbA1c Control (&lt;8%)</b>                                           | 1233              | 64%        | 1299        | 70%        | 6%         | 1235                                    | 72%        | 1219        | 71%        | 0%         | 0.08                          |
| <b>HbA1c Poor Control (&gt;9%)</b>                                      | 1233              | 74%        | 1299        | 80%        | 5%         | 1235                                    | 81%        | 1219        | 81%        | 0%         | 0.09                          |
| <b>Hemoglobin A1c Testing</b>                                           | 1233              | 94%        | 1299        | 94%        | 0%         | 1235                                    | 95%        | 1219        | 94%        | -1%        | >0.99                         |
| <b>Diabetes: Medical Attention for Nephropathy</b>                      | 1232              | 97%        | 1299        | 97%        | 0%         | 1235                                    | 96%        | 1219        | 96%        | 0%         | >0.99                         |
| <b>CHF Appropriate Medication Outpatient – ACEi or ARBs</b>             | 213               | 86%        | 188         | 91%        | 5%         | 261                                     | 86%        | 205         | 91%        | 5%         | >0.99                         |
| <b>CHF Appropriate Medication Outpatient – Beta Blockers</b>            | 66                | 74%        | 54          | 97%        | 22%        | 80                                      | 91%        | 75          | 93%        | 2%         | 0.70                          |
| <b>IVD/CAD – Use of Anti-Platelet Medication</b>                        | 547               | 87%        | 604         | 91%        | 5%         | 1061                                    | 89%        | 1118        | 91%        | 2%         | >0.99                         |
| <b>Depression Screening and Follow Up Plan</b>                          | 3027              | 95%        | 3070        | 99%        | 4%         | 3565                                    | 93%        | 3559        | 98%        | 5%         | >0.99                         |
| <b>Documentation of Designated Decision Maker for Medical Care Form</b> | 1507              | 29%        | 1610        | 61%        | 33%        | 2060                                    | 27%        | 2162        | 54%        | 28%        | 0.17                          |
| <b>Tobacco Use Cessation Counseling</b>                                 | 849               | 85%        | 765         | 91%        | 6%         | 698                                     | 92%        | 669         | 91%        | -1%        | 0.04                          |
| <b>Tobacco Use Assessment</b>                                           | 3715              | 98%        | 3716        | 99%        | 1%         | 4341                                    | 99%        | 4343        | 99%        | 0%         | >0.99                         |

933 <sup>a</sup> Reported p-values for pairwise comparisons of the primary outcome of change in proportion of applicable chronic disease and preventive  
934 evidence-based measures meeting or exceeding benchmarks at the patient level use the Holm-Bonferroni correction. Multiple imputation was used  
935 for the approximately 11% of participants missing follow-up quality metric scores. Abbreviations: BMI, Body Mass Index; IVD, Ischemic  
936 Vascular Disease; CAD, Coronary Artery Disease; COPD, Chronic Obstructive Pulmonary Disease; HbA1c, Hemoglobin A1c; CHF, Congestive  
937 Heart Failure; ACEi, Angiotensin-converting enzyme (ACE) inhibitor; ARBs, Angiotensin II receptor blockers



**eTABLE 4. Sample Characteristics of Cohort Study for Larger Bonus size without Matching**

|                                                           | Larger Bonus Size | All No Larger Bonus Size | 939<br>P-value<br>940 |
|-----------------------------------------------------------|-------------------|--------------------------|-----------------------|
| <b>Number of physicians</b>                               | N = 33            | N = 801                  |                       |
| <b>Age (year), mean (SD)</b>                              | 57 (10)           | 53 (10)                  | 0.04                  |
| <b>Tenure (year), mean (SD)</b>                           | 12 (8)            | 9 (7)                    | 0.03                  |
| <b>Average No. of APP patients in panel, median (IQR)</b> | 67 (138)          | 34 (131)                 | 0.06                  |
| <b>Gender, No. (%)</b>                                    |                   |                          |                       |
| Female                                                    | 15 (45%)          | 285 (36%)                | 0.25                  |
| Male                                                      | 18 (55%)          | 516 (64%)                |                       |
| <b>Specialty, No. (%)<sup>a</sup></b>                     |                   |                          |                       |
| Family Medicine                                           | 14 (42%)          | 153 (19%)                | 0.00                  |
| Internal Medicine                                         | 13 (39%)          | 214 (27%)                |                       |
| Pediatrics                                                | 4 (12%)           | 183 (23%)                |                       |
| Others                                                    | 2 (6%)            | 251 (31%)                |                       |
| <b>Average No. of Chronic Disease, mean (SD)</b>          | 1.60 (0.34)       | 1.47 (0.38)              | 0.05                  |
| <b>Number of patients</b>                                 | N = 3747          | N = 70818                |                       |
| <b>Age (year), median (IQR)</b>                           | 64 (18)           | 68 (18)                  | <.0001                |
| <b>Gender, No. (%)</b>                                    |                   |                          |                       |
| Female                                                    | 2384 (64%)        | 36880 (52%)              | <.0001                |
| Male                                                      | 1358 (36%)        | 33758 (48%)              |                       |
| <b>Race, No. (%)</b>                                      |                   |                          |                       |
| Black or African American                                 | 2667 (71%)        | 7461 (11%)               | <.0001                |
| Caucasian or White                                        | 368 (10%)         | 48658 (69%)              |                       |
| Other                                                     | 149 (4%)          | 4547 (6%)                |                       |
| Unknown                                                   | 563 (15%)         | 10152 (14%)              |                       |
| <b>Average No. of Chronic Disease, mean (SD)</b>          | 1.6 (0.82)        | 1.63 (0.83)              | 0.06                  |

953 <sup>a</sup>Other physicians includes 1 Cardiologist and 1 Pulmonologist in the Larger Bonus Size cohort. For No Larger Bonus Size cohort, Other  
954 physicians includes 28 Allergists/Immunologists, 5 Cardiac Electrophysiologists, 98 Cardiologists, 25 Endocrinologists, 10 Interventional  
955 Cardiologists, 6 Pediatric Allergists/Immunologists, 79 Pulmonologists  
956 Abbreviations: SD, standard deviation; IQR, interquartile range.

957 **eFIGURE 5 – Sensitivity Analysis for RCT without Physician Fixed**  
958 **Effect Clustering at Group Practice Level**

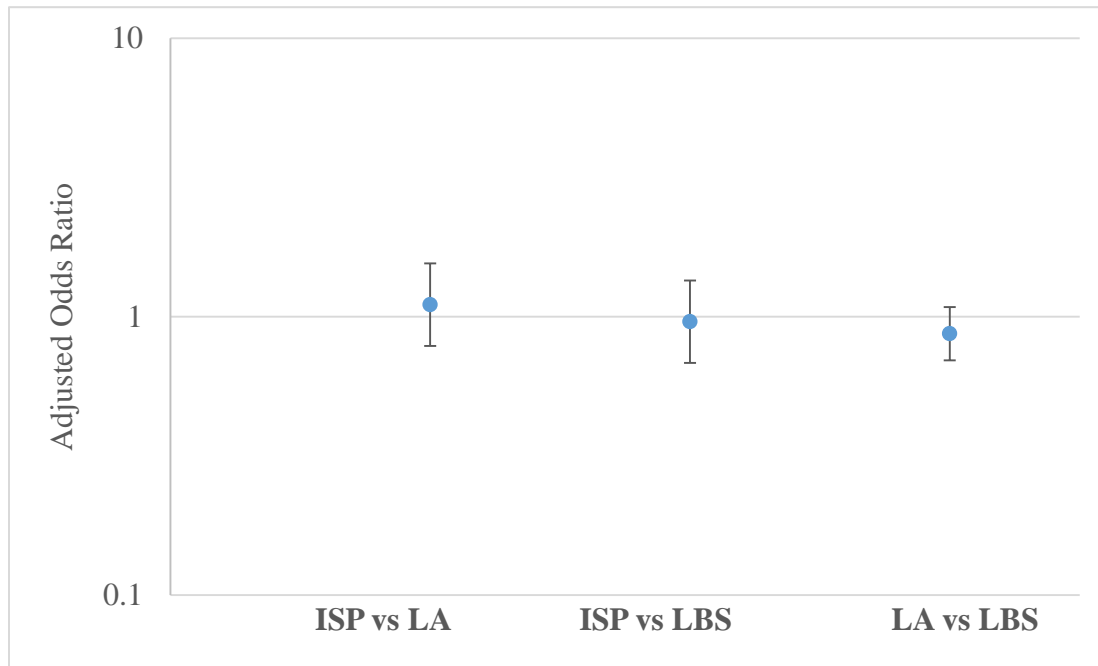

959 Error bars indicate 95% confidence Intervals

961

**ISP:** Larger bonus size + Increased social pressure  
**LA:** Larger bonus size + Loss aversion  
**LBS:** Larger bonus size only (comparison group)

962 **eFIGURE 6 – Sensitivity Analysis for RCT without Imputation**  
963 **(using Complete Case Data)**

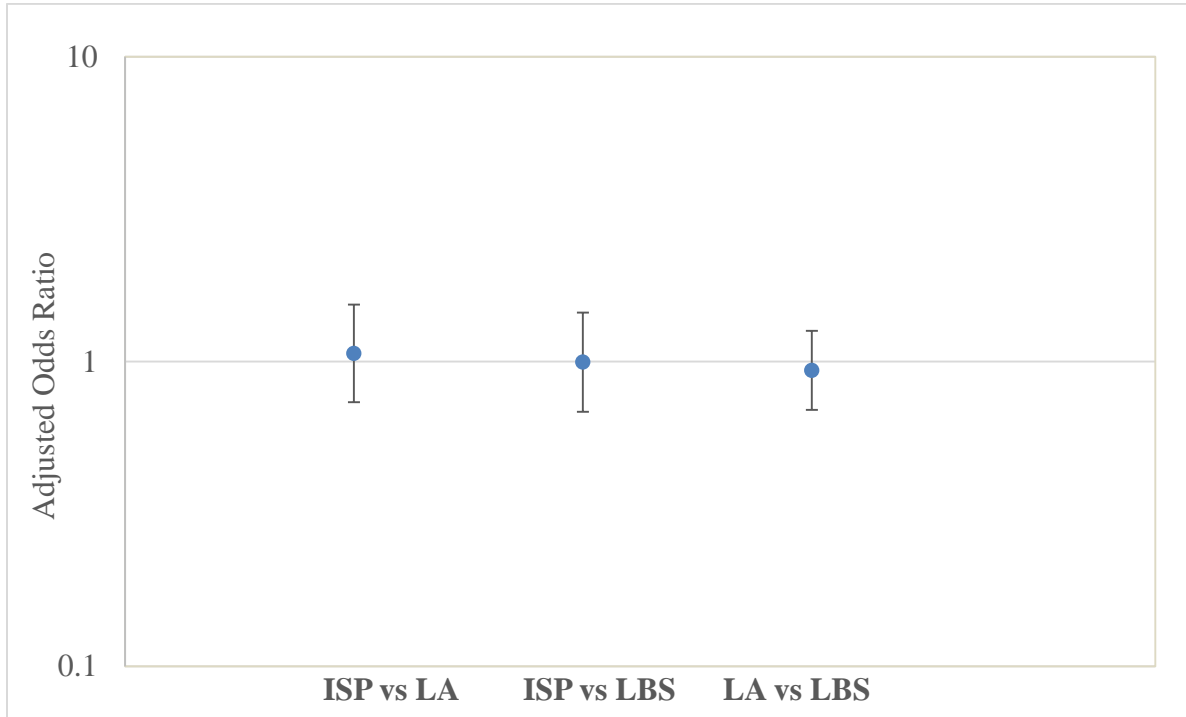

964  
965 Error bars indicate 95% confidence Intervals

**ISP:** Larger bonus size + Increased social pressure<sup>966</sup>  
**LA:** Larger bonus size + Loss aversion  
**LBS:** Larger bonus size only (comparison group)<sup>967</sup>

968  
969  
970  
971  
972  
973  
974  
975  
976

977 **eFIGURE 7 – Sensitivity Analysis for RCT with Physician Random**  
978 **Effect**

979

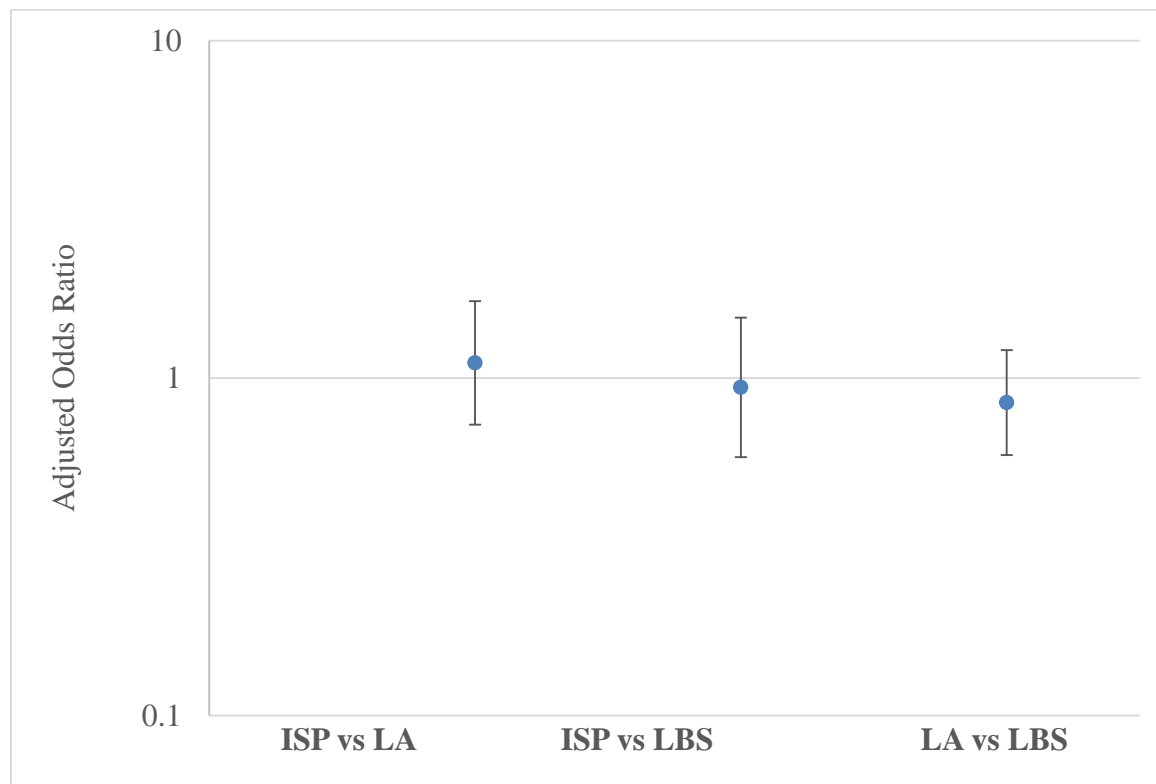

980

981 Error bars indicate 95% confidence Intervals

ISP: Larger bonus size + Increased social pressure<sup>982</sup>  
LA: Larger bonus size + Loss aversion  
LBS: Larger bonus size only (comparison group)

983 **eFIGURE 8 – Sensitivity Analysis of Cohort Study without**  
984 **Imputation (using Complete Case Data)**

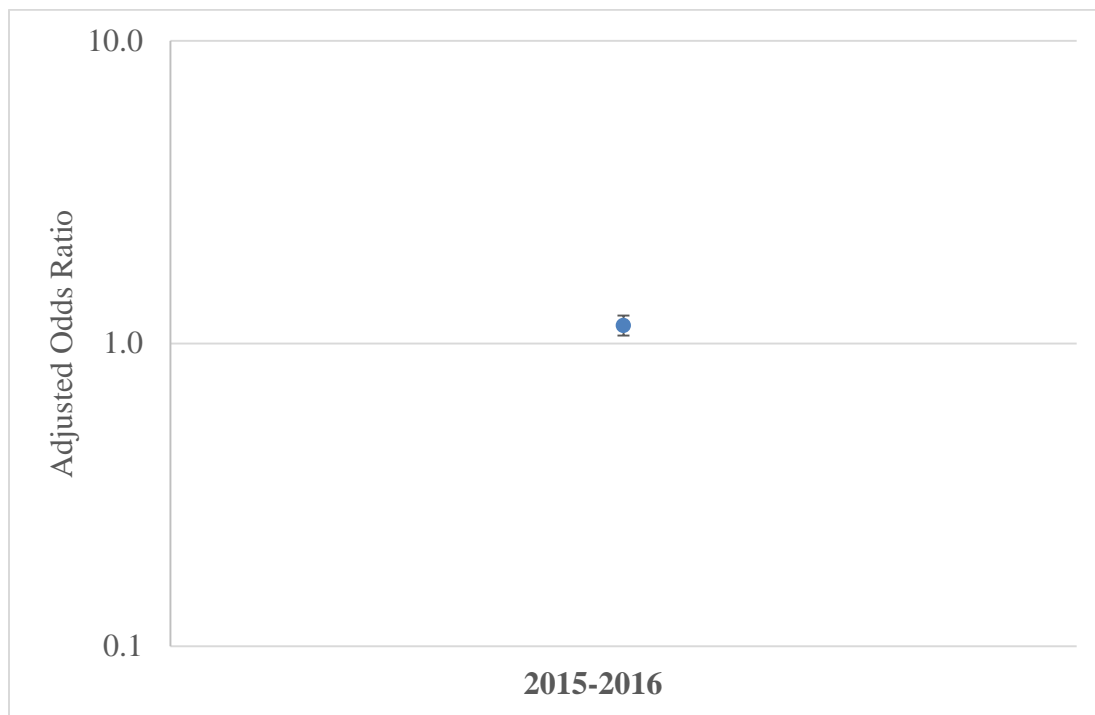

985  
986 The estimate is the effect of the association between larger bonus size and higher achievement of  
987 evidence-based quality measures. The error bars indicate 95% confidence intervals.

988  
989  
990  
991  
992  
993  
994  
995  
996

997 **eFIGURE 9 – Sensitivity Analysis of Cohort Study without**  
998 **Physician Fixed Effects**

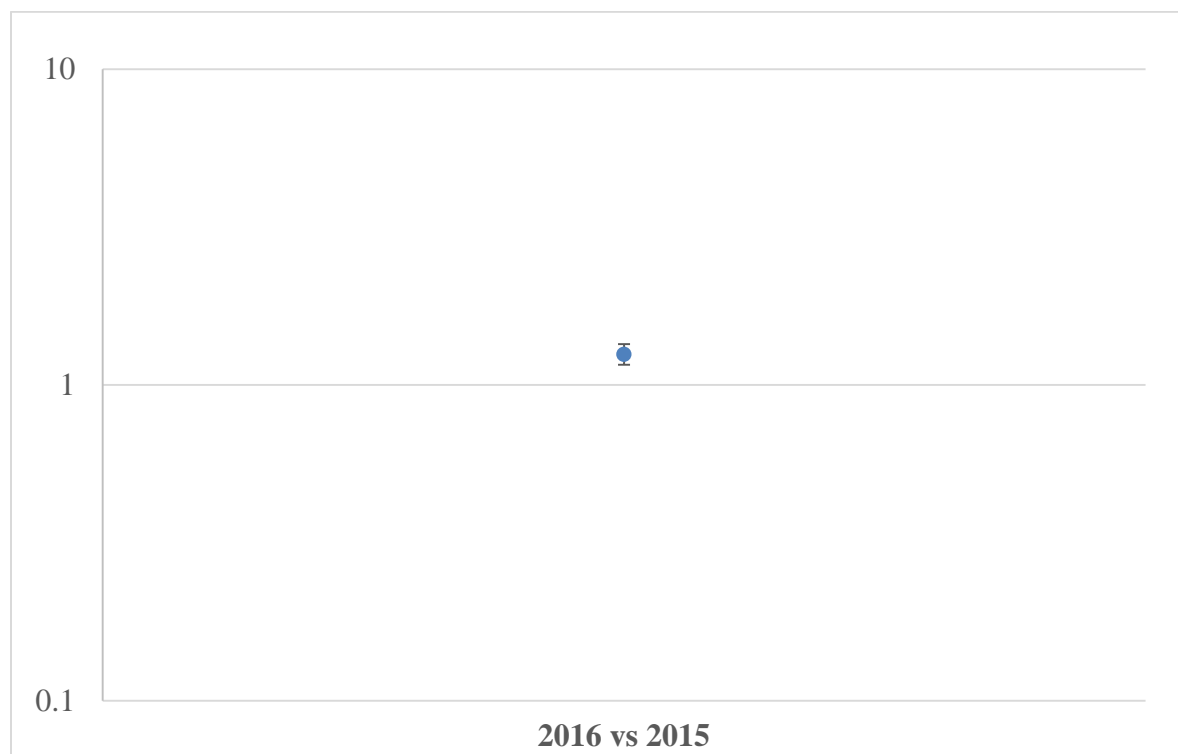

999  
1000 The estimate is the effect of the association between larger bonus size and higher achievement of  
1001 evidence-based quality measures. The error bars indicate 95% confidence intervals.

1002  
1003  
1004  
1005  
1006  
1007  
1008  
1009  
1010

1011 **eTABLE 5 – Test of Trends for Difference-in-Differences Model**  
 1012 **Results**

1013

| Coefficient (SE)              | All Physicians, Weighted | Stable Set of Physicians, Weighted |
|-------------------------------|--------------------------|------------------------------------|
| <b>Year</b>                   | -0.007<br>(0.005)        | -0.006<br>(0.004)                  |
| <b>Trinity</b>                | -0.013<br>(0.031)        | -0.009<br>(0.030)                  |
| <b>Year x Trinity</b>         | -0.011<br>(0.008)        | -0.012<br>(0.007)                  |
| <b>Constant</b>               | 0.854***<br>(0.020)      | 0.851***<br>(0.019)                |
| <b>Observations</b>           | 186                      | 165                                |
| <b>R<sup>2</sup></b>          | 0.116                    | 0.112                              |
| <b>Unique Trinity MDs</b>     | 32                       | 18                                 |
| <b>Unique Non-Trinity MDs</b> | 33                       | 23                                 |

1024

Standard errors in parentheses; \*  $p < 0.05$ , \*\*  $p < 0.01$ , \*\*\*  $p < 0.001$

1025

1026

1027

1028

1029

1030 **eTABLE 6: Results of Physician Survey Administered Pre and Post Intervention**

| Overall                                       | Larger Bonus Size |              |        |        | Loss Aversion & Larger Bonus Size |              |        |        | Increased Social Pressure & Larger Bonus Size |             |        |        |
|-----------------------------------------------|-------------------|--------------|--------|--------|-----------------------------------|--------------|--------|--------|-----------------------------------------------|-------------|--------|--------|
|                                               | Pre<br>n=24       | Post<br>n=14 | Change | t-test | Pre<br>n=26                       | Post<br>n=13 | Change | t-test | Pre<br>n=21                                   | Post<br>n=7 | Change | t-test |
| <b>Baseline Attitudes</b>                     | 4.21              | 4.18         | -0.04  | 0.47   | 3.64                              | 3.69         | 0.06   | 0.45   | 3.98                                          | 4.02        | 0.04   | 0.44   |
| <b>Teamwork</b>                               | 3.89              | 3.91         | 0.03   | 0.48   | 4.11                              | 3.93         | -0.18  | 0.30   | 4.18                                          | 3.82        | -0.37  | 0.02   |
| <b>Financial Salience</b>                     | 3.61              | 3.36         | -0.25  | 0.33   | 3.03                              | 3.69         | 0.67   | 0.04   | 3.35                                          | 3.35        | 0.01   | 0.41   |
| <b>Practice Environment</b>                   | 3.69              | 3.57         | -0.12  | 0.37   | 4.00                              | 3.80         | -0.20  | 0.04   | 3.35                                          | 3.35        | 0.01   | 0.41   |
| <b>Awareness/Understanding</b>                | 3.54              | 3.77         | 0.23   | 0.32   | 3.67                              | 3.67         | 0.00   | 0.50   | 3.40                                          | 3.37        | -0.03  | 0.45   |
| <b>Individual Impact on Clinical Behavior</b> | 3.48              | 3.57         | 0.10   | 0.43   | 3.37                              | 3.22         | -0.15  | 0.26   | 3.47                                          | 3.46        | -0.01  | 0.48   |
| <b>Unintended Consequences</b>                | 2.83              | 3.10         | 0.27   | 0.14   | 2.85                              | 3.33         | 0.48   | 0.01   | 3.14                                          | 3.25        | 0.11   | 0.25   |

1031

1032
