# Supplementary material for: Effect of Financial Bonus Size, Loss Aversion, and Increased Social Pressure on Physician Pay-for-Performance: A Randomized Clinical Trial and Cohort Study
Source: PubMed Central journal article supplement (PMC6484616; doi:10.1001/jamanetworkopen.2018.7950), 2019-02-08
Supplement: jamanetwopen-2-e187950-s003.pdf [file jamanetwopen-2-e187950-s003.pdf]

## **Data Sharing Statement**

Navathe. Effect of Financial Bonus Size, Loss Aversion, and Increased Social Pressure on Physician Pay-for-Performance. *JAMA Netw Open*. Published February 08, 2019.  
10.1001/jamanetworkopen.2018.7950

### **Data**

**Data available:** No
